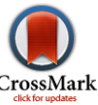

# Phosphomimetic Mutation of Cysteine String Protein- $\alpha$ Increases the Rate of Regulated Exocytosis by Modulating Fusion Pore Dynamics in PC12 Cells

Ning Chiang<sup>1,2,3</sup>, Yu-Tien Hsiao<sup>1</sup>, Hui-Ju Yang<sup>1</sup>, Yu-Chun Lin<sup>5</sup>, Juu-Chin Lu<sup>5\*</sup>, Chih-Tien Wang<sup>1,2,3,4\*</sup>

**1** Institute of Molecular and Cellular Biology, National Taiwan University, Taipei, Taiwan, **2** Department of Life Science, National Taiwan University, Taipei, Taiwan, **3** Neurobiology and Cognitive Science Center, National Taiwan University, Taipei, Taiwan, **4** Genome and Systems Biology Degree Program, National Taiwan University, Taipei, Taiwan, **5** Department of Physiology and Pharmacology, College of Medicine, Chang Gung University, Tao-Yuan, Taiwan

## Abstract

**Background:** Cysteine string protein- $\alpha$  (CSP $\alpha$ ) is a chaperone to ensure protein folding. Loss of CSP $\alpha$  function associates with many neurological diseases. However, its function in modulating regulated exocytosis remains elusive. Although *csp $\alpha$* -knockouts exhibit impaired synaptic transmission, overexpression of CSP $\alpha$  in neuroendocrine cells inhibits secretion. These seemingly conflicting results lead to a hypothesis that CSP $\alpha$  may undergo a modification that switches its function in regulating neurotransmitter and hormone secretion. Previous studies implied that CSP $\alpha$  undergoes phosphorylation at Ser<sup>10</sup> that may influence exocytosis by altering fusion pore dynamics. However, direct evidence is missing up to date.

**Methodology/Principal Findings:** Using amperometry, we investigated how phosphorylation at Ser<sup>10</sup> of CSP $\alpha$  (CSP $\alpha$ -Ser<sup>10</sup>) modulates regulated exocytosis and if this modulation involves regulating a specific kinetic step of fusion pore dynamics. The real-time exocytosis of single vesicles was detected in PC12 cells overexpressing control vector, wild-type CSP $\alpha$  (WT), the CSP $\alpha$  phosphodeficient mutant (S10A), or the CSP $\alpha$  phosphomimetic mutants (S10D and S10E). The shapes of amperometric signals were used to distinguish the full-fusion events (i.e., prespike feet followed by spikes) and the kiss-and-run events (i.e., square-shaped flickers). We found that the secretion rate was significantly increased in cells overexpressing S10D or S10E compared to WT or S10A. Further analysis showed that overexpression of S10D or S10E prolonged fusion pore lifetime compared to WT or S10A. The fraction of kiss-and-run events was significantly lower but the frequency of full-fusion events was higher in cells overexpressing S10D or S10E compared to WT or S10A. Advanced kinetic analysis suggests that overexpression of S10D or S10E may stabilize open fusion pores mainly by inhibiting them from closing.

**Conclusions/Significance:** CSP $\alpha$  may modulate fusion pore dynamics in a phosphorylation-dependent manner. Therefore, through changing its phosphorylated state influenced by diverse cellular signalings, CSP $\alpha$  may have a great capacity to modulate the rate of regulated exocytosis.

**Citation:** Chiang N, Hsiao Y-T, Yang H-J, Lin Y-C, Lu J-C, et al. (2014) Phosphomimetic Mutation of Cysteine String Protein- $\alpha$  Increases the Rate of Regulated Exocytosis by Modulating Fusion Pore Dynamics in PC12 Cells. PLoS ONE 9(6): e99180. doi:10.1371/journal.pone.0099180

**Editor:** Stephane Gasman, UPR 3212 CNRS -Université de Strasbourg, France

**Received:** January 18, 2014; **Accepted:** May 12, 2014; **Published:** June 23, 2014

**Copyright:** © 2014 Chiang et al. This is an open-access article distributed under the terms of the Creative Commons Attribution License, which permits unrestricted use, distribution, and reproduction in any medium, provided the original author and source are credited.

**Funding:** Funding was provided by Chang Gung Medical Research Project (CMRPD1C0591) and National Science Council (NSC-101-2320-B-182-007; NSC-102-2320-B-182-022-MY3) to JCL; National Taiwan University, National Science Council (NSC-97-2311-B-002-001-MY2; NSC-100-2321-B-002-001; NSC-100-2311-B-002-010) and National Health Research Institutes (NHRI-EX100-9718NC) to CTW. The funders had no role in study design, data collection and analysis, decision to publish, or preparation of the manuscript.

**Competing Interests:** The authors have declared that no competing interests exist.

\* Email: chihchienwang@ntu.edu.tw (C-TW); juuchin@mail.cgu.edu.tw (J-CL)

## Introduction

Secretion of neurotransmitters and hormones from vesicles is mediated by regulated exocytosis. During the initial stage of vesicle fusion, the fusion pore is a dynamic structure that transiently connects the vesicle to the plasma membrane, and subsequently undergoes full dilation to cause membrane fusion [1]. The minimal fusion machinery is formed by the four  $\alpha$ -helical bundles in the soluble N-ethylmaleimide-sensitive factor attachment protein receptor (SNARE) complex. This complex comprises two t-SNARE proteins, syntaxin (Syx) and synaptosome-associated protein of 25 kDa (SNAP-25/SN25), on the plasma membrane, and one v-SNARE protein, synaptobrevin (Syb), on the vesicle membrane. This complex and its constituents can interact with the

Ca<sup>2+</sup> sensor protein synaptotagmin (Syb) [2]. Upon Ca<sup>2+</sup> entry, Syb regulates fusion pore opening and dilation, through binding to Ca<sup>2+</sup> molecules and triggering the downstream interactions, resulting in vesicle fusion and transmitter release [2,3,4,5,6,7,8,9,10,11]. Recently, several studies have identified a co-chaperone cysteine string protein (CSP) that facilitates the correct folding of SNARE proteins, e.g., Syb [12], SN25 [13], and SNARE complex [14]. Thus, CSP may function as a modulator of the final fusion process during regulated exocytosis [15,16].

CSP, first discovered in *Drosophila* [17], is a vesicle membrane protein localized to both synaptic vesicles (SVs) [18] and large dense-core vesicles (LDCVs) [19,20,21]. Three CSP isoforms ( $\alpha$ ,  $\beta$ , and  $\gamma$ ) have been found in mammal, but only CSP $\alpha$  is expressed in brain and endocrine cells [22]. Deletion of CSP $\alpha$  in *Drosophila* or

mouse impairs synaptic transmission, leading to progressive neurodegeneration and premature death [22,23,24]. In addition, suppression of CSP $\alpha$  expression reduces Ca<sup>2+</sup>-dependent LDCV exocytosis in permeabilized pancreatic  $\beta$ -cells [25]. These two results suggest that CSP $\alpha$  promotes neurotransmitter release. However, overexpression of CSP $\alpha$  also inhibits secretion in pancreatic  $\beta$ -cells [20] and adrenal chromaffin cells [21], implying that CSP $\alpha$  inhibits regulated exocytosis. These seemingly conflicting results have led to the hypothesis that CSP $\alpha$  may undergo a modification at certain condition that switches its function in regulating neurotransmitter and hormone secretion. Interestingly, in neuroendocrine cells and mammalian brain, the Ser<sup>10</sup> residue at CSP $\alpha$  (CSP $\alpha$ -Ser<sup>10</sup>) can be phosphorylated by both protein kinase A (PKA) and protein kinase B (PKB)/Akt [15,26,27,28]. Thus, this specific serine residue may serve as a site where cellular signals converge to modulate the function of CSP $\alpha$  in regulated exocytosis. Further studies showed that phosphorylation of CSP $\alpha$ -Ser<sup>10</sup> limits the interaction between CSP $\alpha$  and Syt isoforms, e.g., Syt I and IX [15,16], suggesting that CSP $\alpha$  phosphorylation may regulate fusion pore dynamics. In addition, CSP $\alpha$  regulates the polymerization of dynamin I, a protein mediating vesicle fission, suggesting that CSP $\alpha$  participates in synaptic vesicle endocytosis [29]. However, direct evidence is currently missing whether phosphorylation of CSP $\alpha$ -Ser<sup>10</sup> affects fusion pore dynamics during regulated exocytosis.

Here, we addressed this question using amperometry, an electrochemical technique with high temporal resolution. This technique can resolve the dynamics of fusion pores created by individual vesicles containing readily oxidizable neurotransmitters, e.g., norepinephrine (NE). For a vesicle undergoing full fusion, amperometric recordings indicate the initial opening of a fusion pore as a prespike foot (PSF) that reflects the vesicle content leaking out through the fusion pore [30]. This transient fusion pore can either dilate to expel all the content, producing a spike in amperometric recordings, or it can close and retain most of the content, producing the kiss-and-run event owing to transient fusion without full dilation [31,32]. Given that spikes preceded by prespike feet are established as full-fusion events, whereas square-shaped, stand-alone flickers are established as kiss-and-run events [30,31,32,33,34], the amperometric shape has been widely used to reveal various molecular mechanisms controlling fusion pore dynamics in the past decade [3,6,8,35,36,37,38,39]. In this study, we combined single-event amperometry with molecular perturbation to investigate how the phosphomutants of CSP $\alpha$ -Ser<sup>10</sup> modulate regulated exocytosis and if this modulation involves regulating a specific kinetic step of fusion pore dynamics.

## Results

### CSP $\alpha$ phosphodeficient mutation decreases the secretion rate from PC12 cells

Three isoforms of CSP ( $\alpha$ ,  $\beta$ , and  $\gamma$ ) have been reported previously [22]. Thus, we used RT-qPCR to determine the major isoform(s) expressed in PC12 cells (Text S1). We found that the mRNA expression level of CSP $\alpha$  was significantly higher than that of either CSP $\beta$  ( $p < 0.05$ ) or CSP $\gamma$  ( $p < 0.05$ ), suggesting that CSP $\alpha$  is likely the most abundant isoform expressed in PC12 cells (Figure S1-A). CSP $\alpha$  exists in two RNA splicing variants, CSP $\alpha$ 1 and CSP $\alpha$ 2 [20]. We further studied the cDNA of PC12 cells and confirmed that CSP $\alpha$ 1, but not CSP $\alpha$ 2, exists in PC12 cells (Figure S1-A, inset). Thus, in all our experiments, we molecularly perturbed CSP $\alpha$ 1, and from here on, we will refer to CSP $\alpha$ 1 simply as CSP $\alpha$ .

To study how phosphorylation affects CSP $\alpha$ 's function, we used site-directed mutagenesis to create one phosphodeficient mutant (S10A) and two phosphomimetic mutants (S10D and S10E) of CSP $\alpha$ . We transfected the control vector pIRES2EGFP (Ctrl), wild-type CSP $\alpha$  (WT), or phosphomutant CSP $\alpha$  (S10A, S10D, or S10E) into PC12 cells by electroporation, allowing overexpression after 3 days post transfection for further experiments. To confirm the effectiveness of transfection, we examined the mRNA expression levels of different CSP isoforms in these transfected groups. In all CSP $\alpha$ -transfected groups, the mRNA levels of CSP $\alpha$  were 20-fold more than those levels of CSP $\beta$  or CSP $\gamma$  (Figure S1-B). Western analysis also confirmed that CSP was overexpressed more in all CSP $\alpha$ -transfected groups compared to Ctrl (Text S1 and Figure S1-C).

To determine if this overexpression affected the secretion rate, we performed single-event amperometry to detect Ca<sup>2+</sup>-dependent NE release from transfected cells in each group. We recorded amperometric traces by applying KCl to depolarize the cells and trigger Ca<sup>2+</sup>-regulated exocytosis (Fig. 1A). Plots of the cumulative fusion events (for events with peak amplitude  $\geq 2$  pA) [3] showed the different secretion rates across the various groups (Fig. 1B). We compared the rate of fusion events  $\geq 2$  pA (or secretion rate) for individual PC12 cells across the groups (Fig. 1C). We found that wild-type CSP $\alpha$  overexpression (from here on termed WT) gave the secretion rate comparable to overexpression of control vector (termed Ctrl). Moreover, S10A overexpression (termed S10A) produced the secretion rate comparable to WT, but significantly lower ( $p < 0.05$ ) compared to Ctrl (Fig. 1C). However, overexpression of the CSP $\alpha$  phosphomimetic mutants significantly altered the rates. S10D overexpression (termed S10D) evoked the secretion rate that was significantly higher than WT ( $p < 0.05$ ) or S10A ( $p < 0.001$ ). Similarly, S10E overexpression (termed S10E) gave the secretion rate that was significantly higher than WT ( $p < 0.05$ ) or S10A ( $p < 0.01$ ). These findings suggest that phosphodeficiency in CSP $\alpha$ -Ser<sup>10</sup> may decrease the secretion rate during regulated exocytosis.

### CSP $\alpha$ phosphomutation does not change the expression levels of essential exocytotic proteins, or the targeting of CSP $\alpha$ to cell periphery

Since CSP $\alpha$  serves as a chaperone to ensure correct folding and thus can stabilize exocytotic proteins [12,13,14], we next examined if CSP $\alpha$  phosphorylation affects the expression levels of the Ca<sup>2+</sup> sensor Syt I or of the SNARE proteins (Syx I, SN25, and Syb). We found that overexpression of CSP $\alpha$  or its phosphomutants did not affect the levels of any of these proteins (Text S1 and Figure S1-C), suggesting that CSP $\alpha$  phosphomutation does not alter the expression levels of essential exocytotic proteins.

Since we are studying release from LDCVs, we next checked whether CSP localized to cell periphery after KCl depolarization in PC12 cells overexpressing CSP $\alpha$  or its phosphomutants (Text S1 and Figure S1-D). We found that CSP mainly localized to cell periphery in cells overexpressing CSP $\alpha$  and its phosphomutants (Figure S1-D). Hence, overexpression of CSP $\alpha$  or its phosphomutants may not alter the subcellular localization of CSP $\alpha$ .

### CSP $\alpha$ phosphomimetic mutation prolongs the opening of the initial fusion pore that forms before dilation

In amperometric recordings, the small rising signal that precedes a steep spike is referred to as a PSF, and it represents the transient opening of the initial fusion pore prior to dilation (Fig. 2A, shaded area). To examine if CSP $\alpha$  phosphomutation

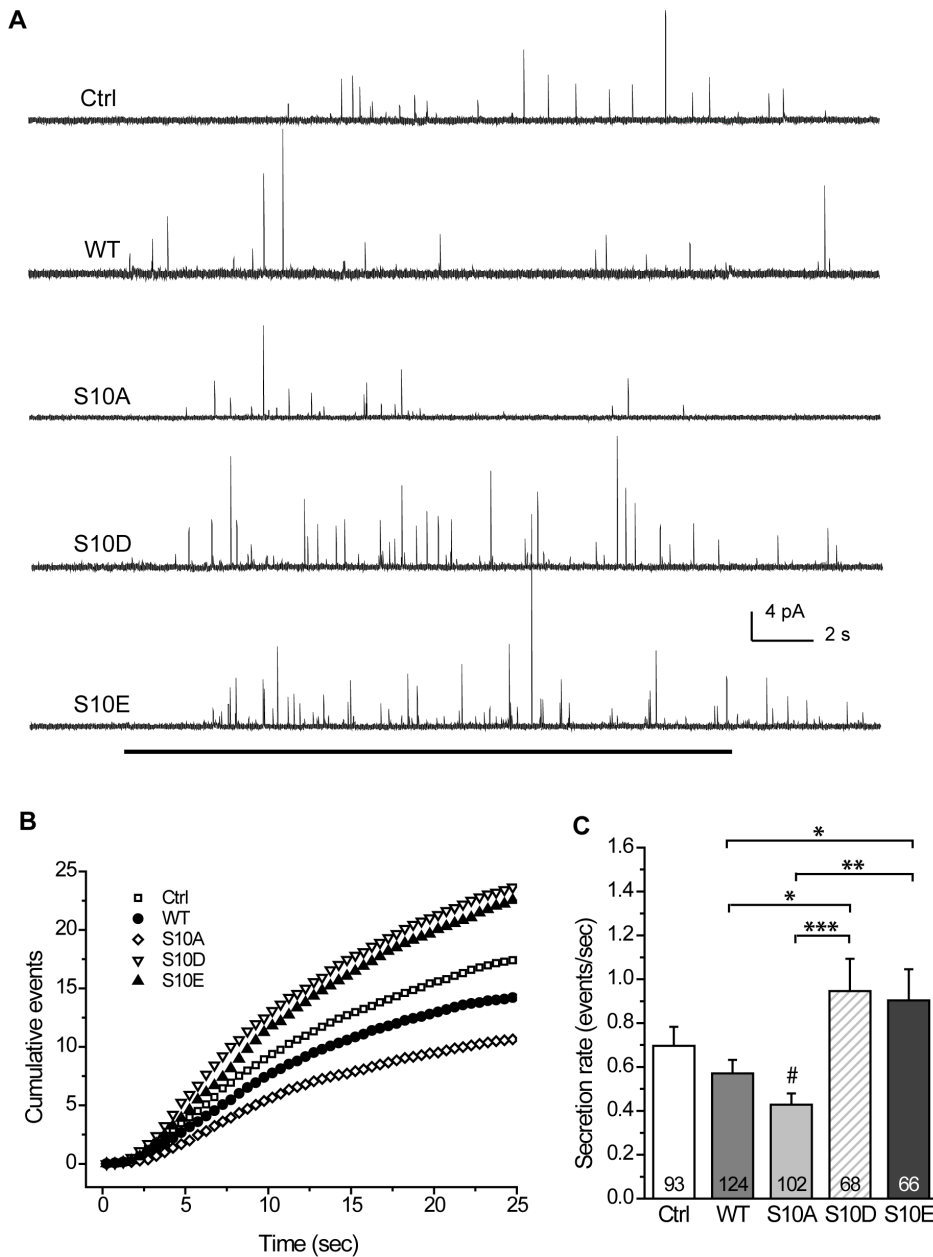

**Figure 1. Secretion events in PC12 cells that overexpress CSP and its phosphomutants.** **A**, Representative amperometric recordings of secretion events in PC12 cells that overexpress control vector (Ctrl), wild-type (WT), S10A, S10D, or S10E CSP $\alpha$ . Black line at bottom indicates the duration of KCl application (20 sec). **B**, Cumulative events for groups described in (A). Cumulative counts were normalized by cell numbers. **C**, The secretion rate was acquired from the onset of KCl application to the end of the recording (total 25 sec) by using the cellular mean method. Numbers in bars indicate number of cells recorded for each group. Total 1092–1771 events for those cells. doi:10.1371/journal.pone.0099180.g001

affects the opening of this initial fusion pore, we analyzed the characteristics of the PSF associated with spikes. For each transfection group, we constructed the histograms of PSF lifetimes in a semi-logarithmic plot (termed PSF lifetime distributions) and fitted the data by a single-exponential decay function (Fig. 2B) [3,6]. The fitted lines gave the mean PSF duration,  $\tau$  (Fig. 2B and C). The WT group's  $\tau$  was similar to that for Ctrl and S10A groups. The S10D and S10E groups had comparable  $\tau$ 's but both of these were higher than those for other groups: the S10D group's  $\tau$  was significantly higher than that for S10A ( $p < 0.05$ ) and WT ( $p < 0.05$ ) groups; the S10E's  $\tau$  was significantly higher than that for

S10A ( $p < 0.001$ ), WT ( $p < 0.01$ ), and Ctrl ( $p < 0.05$ ) groups. These results suggest that CSP $\alpha$  phosphomimetic mutation prolongs the opening of the fusion pore that leads to dilation. Notably, the mean amplitude of the PSF showed no significant difference across groups (Fig. 2D), suggesting that CSP $\alpha$  phosphomutation does not affect the flux through the initial fusion pore. In comparison, the PSF area was significantly increased by phosphomimetic mutants: the S10D group's PSF area was significantly higher than that for WT ( $p < 0.05$ ) groups; the S10E's PSF area was significantly higher than that for S10A ( $p < 0.05$ ), WT ( $p < 0.05$ ), and Ctrl ( $p < 0.05$ )

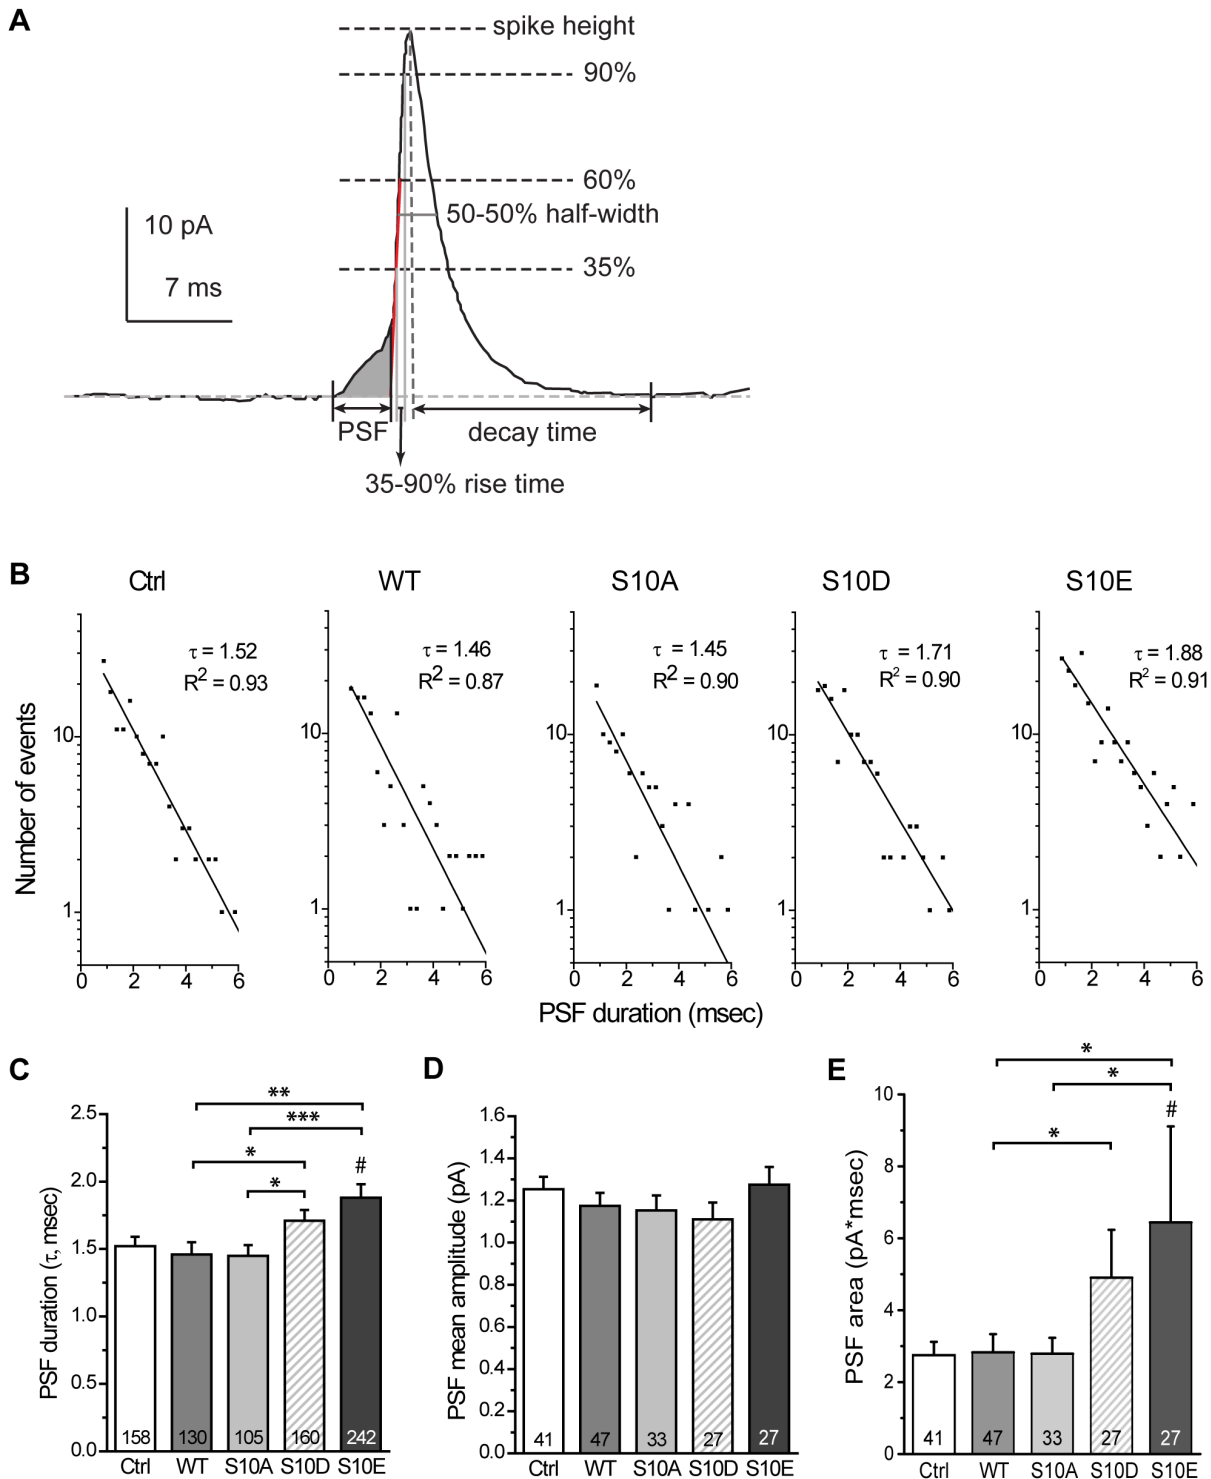

**Figure 2. Characteristics of the PSF in cells overexpressing CSP and its phosphomutants.** **A**, The amperometric recording for a full-fusion event from a single vesicle. The prespike foot (PSF, shown as shaded area) reports the initial opening of a fusion pore and the spike begins when the fusion pore enters into the dilation phase. The PSF lifetime was measured from onset (the current rising to  $1 \times$ RMS noise above the baseline current) to end point (the intersection between the baseline and the red line going through the rise phase from 35 to 60% of the peak). The features of PSF and spikes analyzed in this study are illustrated (see Materials and Methods for detail). **B**, PSF lifetime distributions were constructed for the indicated groups. Distributions were fitted by the single-exponential decay function  $N(t) = N(0) \times \exp(-t/\tau)$  to yield the mean PSF duration  $\tau$  (the goodness of the fits:  $R^2 \sim 0.90$ ). **C**,  $\tau$  obtained in (B) for each group. Numbers in bars indicate the number of PSF used for each calculation. **D**, PSF mean amplitudes calculated by the cellular means method. **E**, PSF areas calculated by the cellular means method. For D and E, numbers in bars indicate the number of cells used for each calculation.

doi:10.1371/journal.pone.0099180.g002

groups (Fig. 2E). Thus, CSP $\alpha$  phosphomimetic mutation may alter the kinetics of the initial fusion pore that forms prior to dilation.

### CSP $\alpha$ phosphodeficient mutation increases the fraction of kiss-and-run events

Since CSP $\alpha$  phosphomimetic mutation can regulate the kinetics of the fusion pore that lead to full dilation, we next investigated if CSP $\alpha$  phosphomutation alters the dynamics of transient fusion without full dilation, i.e., kiss-and-run (termed KR). To study these KR events, we collectively examined all events that we defined as signals (peak amplitude  $\geq 2$  pA) and constructed the cumulative probability of the peak amplitudes for all events (Fig. 3A). Compared to Ctrl and WT, the half-maximal probability right-shifted for the S10D and S10E groups, and left-shifted for the S10A group. These tendencies were most apparent in events with peak amplitude between 2–4 pA (Fig. 3A, inset). In the zoomed traces of amperometric recordings (Figure S2), we found that most of these small events were of square-like shape, representing putative KR events [30,31,32,33,34]. Thus, the right shifts in the cumulative probability of the peak amplitudes for S10D and S10E suggest that phosphomimetic mutants exhibit fewer numbers of KR events.

To further explore if CSP $\alpha$  phosphorylation plays a role in regulating KR events, we utilized an approach described in a previous study [6] to analyze these two types of fusion events in our amperometric recordings: KR events (i.e., square-like events) (Fig. 3B, left) and full-fusion events (i.e., PSF followed by spikes) (Fig. 3B, right). To distinguish these events, we examined two values of duration,  $t_1$  and  $t_2$  (Fig. 3B). Duration  $t_1$  indicates the time between the onset of the rise and when the signal falls back to the average value of amplitude above the 50% peak amplitude. Duration  $t_2$  represents the time between the onset of the rise and when the signal returns to baseline [6] (see Materials and Methods). We found that the ratio of  $t_1$  to  $t_2$  was very sensitive to the event shape. Square-like events exhibit larger  $t_1/t_2$  ratios than spike-like events (Fig. 3B–C). Thus, the ratio of  $t_1$  to  $t_2$  provided an index of event shape that was used to evaluate the putative KR events or spikes.

Scatter plots showed the relationship between peak amplitudes and  $t_1/t_2$  ratios for all events in the transfected groups (Fig. 3D). In this analysis, the ratios of  $t_1$  to  $t_2$  were averaged for the events with peak amplitudes in the same bin and plotted versus peak amplitudes [6]. We found that the ratios ( $t_1/t_2$ ) for peak amplitudes  $\geq 3.5$  pA had a steady but low value and can be fitted by linear regression (Fig. 3D, solid lines). By contrast, the ratios ( $t_1/t_2$ ) started to rise sharply and shift apart from the fitting lines at 3.5 pA. This plot thus demonstrates a difference in shape between spikes and KR events, with a transition point just below 3.5 pA of peak amplitude. Thus, the cut-off peak amplitudes of 3.5 pA (Fig. 3D, dashed lines) can be used to divide the whole population of events into spike-like (full fusion) events and square-like (considered as KR) events.

To further verify whether these putative KR events (i.e., signals with peak amplitudes of 2–3.5 pA) are square-like events, we constructed their “mean” amplitude distributions for these square-like events. The mean amplitude was calculated as event area divided by duration, for comparison with PSF mean amplitude (see Materials and Methods). The putative KR events should confer two characteristics in their mean amplitudes. First, the mean amplitudes of putative KR events should be indistinguishable from those of PSF because both of them are generated from the non-dilating fusion pore. Second, in contrast to spikes where the dilating fusion pore allows the NE flux to rise sharply, the NE

flux does not increase as the pore stays open in the putative KR events.

We found that in all groups, these mean amplitude distributions for putative KR events (the signals with peak amplitudes of 2–3.5 pA corresponding to mean amplitudes of 0.3–2 pA) can be fitted by a single Gaussian distribution (Fig. 4A), suggesting that these square-like events arise from a single distinct population as reported previously [6]. Moreover, the mean amplitude of putative KR events (Fig. 4A) were comparable to those of PSF (Fig. 2D), suggesting that the KR events were from the non-dilating fusion pore. In contrast, the mean amplitude distributions for the events  $\geq 3.5$  pA were relatively skewed (the signals with peak amplitudes  $\geq 3.5$  pA corresponding to mean amplitudes  $> 1$  pA) (Figure S3), similar to the previous reports for spike height or area [6,40,41,42,43].

Since KR events confer the unique square or rectangular shape [31,32], we determined if the shape of these 2–3.5 pA events is essentially square (or rectangular). We used a scatter plot to examine the correlation between the duration and mean amplitude of these events (Fig. 4B). Linear fitting of these scatter plots showed little correlation ( $R^2$  ranging from  $-0.001$  to  $0.021$ ), suggesting that these 2–3.5 pA events seem to be square- or rectangular-shaped signals whose amplitudes do not change over time, corresponding to the opening of non-dilating fusion pores [6,31,32,33,34,35]. Similarly, we found little correlation between the PSF's durations and mean amplitudes ( $R^2 = 0.012$ – $0.126$ ) (Fig. 4C). Thus, the 2–3.5 pA events reflect KR events, corresponding to the transient openings of initial fusion pores. In some cases, these fusion pores dilate and lead to full fusion, producing PSF followed by spikes.

To quantify the effect of CSP $\alpha$  phosphomutation on the occurrence of KR events, we compared the fraction of KR events ( $X_{KR}$ ) across all groups (Fig. 5A). We found that the  $X_{KR}$  for WT was significantly higher than that for Ctrl ( $p < 0.05$ ). Moreover, it was significantly higher than that for S10D ( $p < 0.01$ ) and for S10E ( $p < 0.01$ ). The  $X_{KR}$  for WT was comparable to that for S10A, but the  $X_{KR}$  for S10A was significantly higher than that for S10D ( $p < 0.01$ ), for S10E ( $p < 0.01$ ), and for Ctrl ( $p < 0.05$ ). These results suggest that CSP $\alpha$  phosphodeficiency increases the occurrence of KR events, and thus may play a role in regulating KR exocytosis.

### CSP $\alpha$ phosphodeficient mutation decreases the frequency of full fusion

Since S10A regulates the fraction of KR events, we next examined if it affects the frequency of full-fusion events. We assessed the amperometric recordings for signals that had peak amplitudes  $\geq 3.5$  pA in the same dataset used for the analysis of KR events. We calculated spike frequency using the cellular mean method (Fig. 5B). These frequencies across Ctrl and WT were comparable. In contrast, spike frequency for WT was significantly less than that for S10 D ( $p < 0.01$ ) and S10E ( $p < 0.05$ ), and spike frequency for S10A was significantly less than that for S10 D ( $p < 0.01$ ), S10E ( $p < 0.01$ ), and Ctrl ( $p < 0.05$ ), suggesting that CSP $\alpha$  phosphodeficiency decreases the frequency of full-fusion events. However, CSP $\alpha$  phosphomutation did not affect other spike characteristics, including spike height, half-width, rise time, decay time, and whole area (Table S1), suggesting that this phosphorylation site may not affect the filling of LDCVs or the post-dilation events after fusion pore opening.

### CSP $\alpha$ phosphomutation modulates fusion pore dynamics

Our amperometric recordings indicate that S10A decreases the secretion rate, increases the fraction of KR events, and decreases the frequency of full-fusion events compared to Ctrl. In addition,

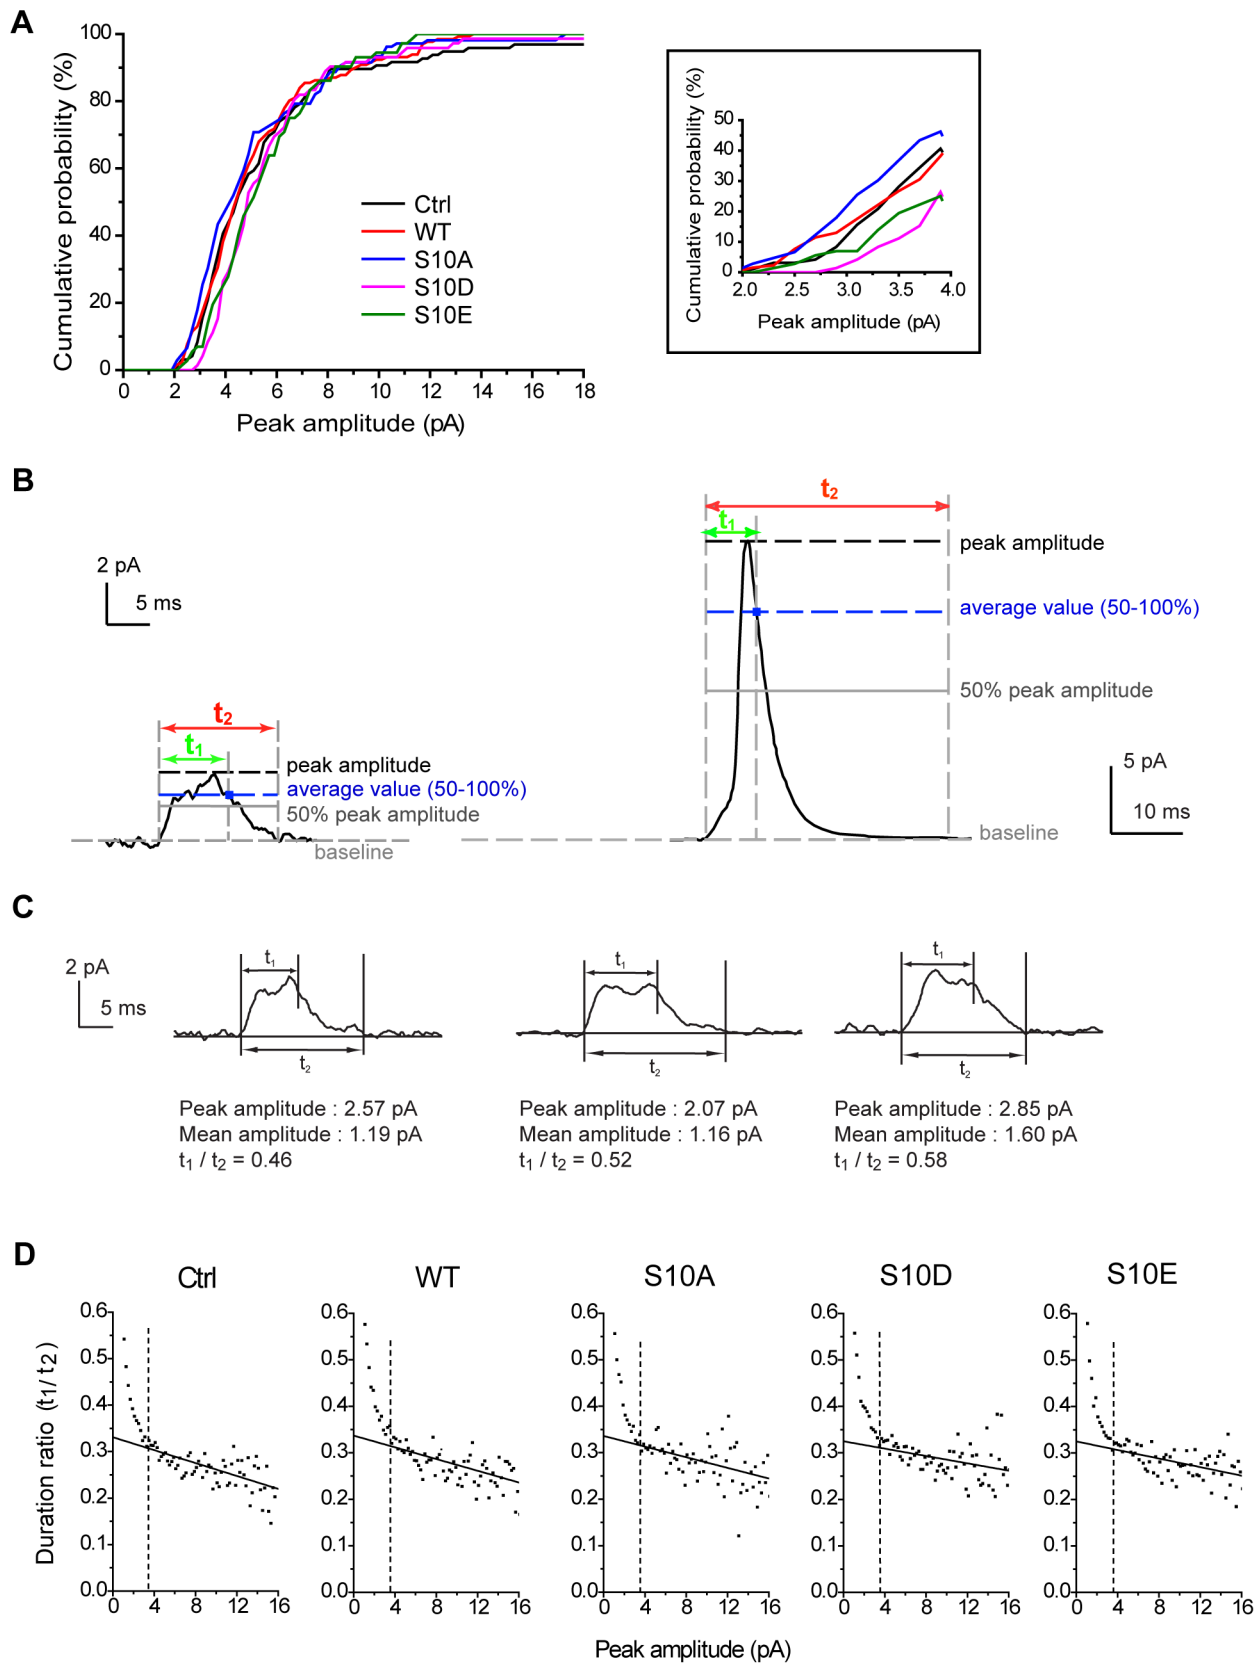

**Figure 3. Two types of fusion events in cells overexpressing CSP and its phosphomutants.** **A**, Cumulative probability of peak amplitudes for all events  $\geq 2$  pA. Inset, expanded view of this cumulative probability in the 2 to 4 pA amplitude range. **B**, Representative traces of kiss-and-run (KR) (left) and full-fusion (right) events. Two durations distinguish KR from full-fusion events. Duration  $t_1$  (green) represents the duration from signal onset to when the signal falls back to the average value above the 50% peak amplitude. Duration  $t_2$  (red) represents the duration from onset to when

the signal returns to within  $1 \times \text{RMS}$  noise of the baseline. Black dashed lines, the peak amplitude of the event. Gray solid lines, 50% of peak amplitude. Blue dashed lines, the average value of the data within 50–100% peak amplitude. Gray dashed lines, baseline (horizontal) or the time boundaries (vertical) for duration  $t_1$  or  $t_2$ . Blue squares, the end point of duration  $t_1$ . **C**, Peak amplitudes, mean amplitudes, and duration ratios can be obtained from individual KR events. **D**, Scatter plots of duration ratios ( $t_1/t_2$ ) vs. peak amplitudes for events in all groups ( $n = 5583\text{--}9198$  events). Duration ratios were averaged for events with peak amplitudes in the same bin and plotted versus peak amplitude (Note that we acquired all signals with the peak amplitude  $\geq 1$  pA here). Solid lines indicate the linear fits for the events with peak amplitude  $> 3.5$  pA. Dashed lines indicate the transition point (3.5 pA of peak amplitude) between the solid lines and the rising phase of the data. doi:10.1371/journal.pone.0099180.g003

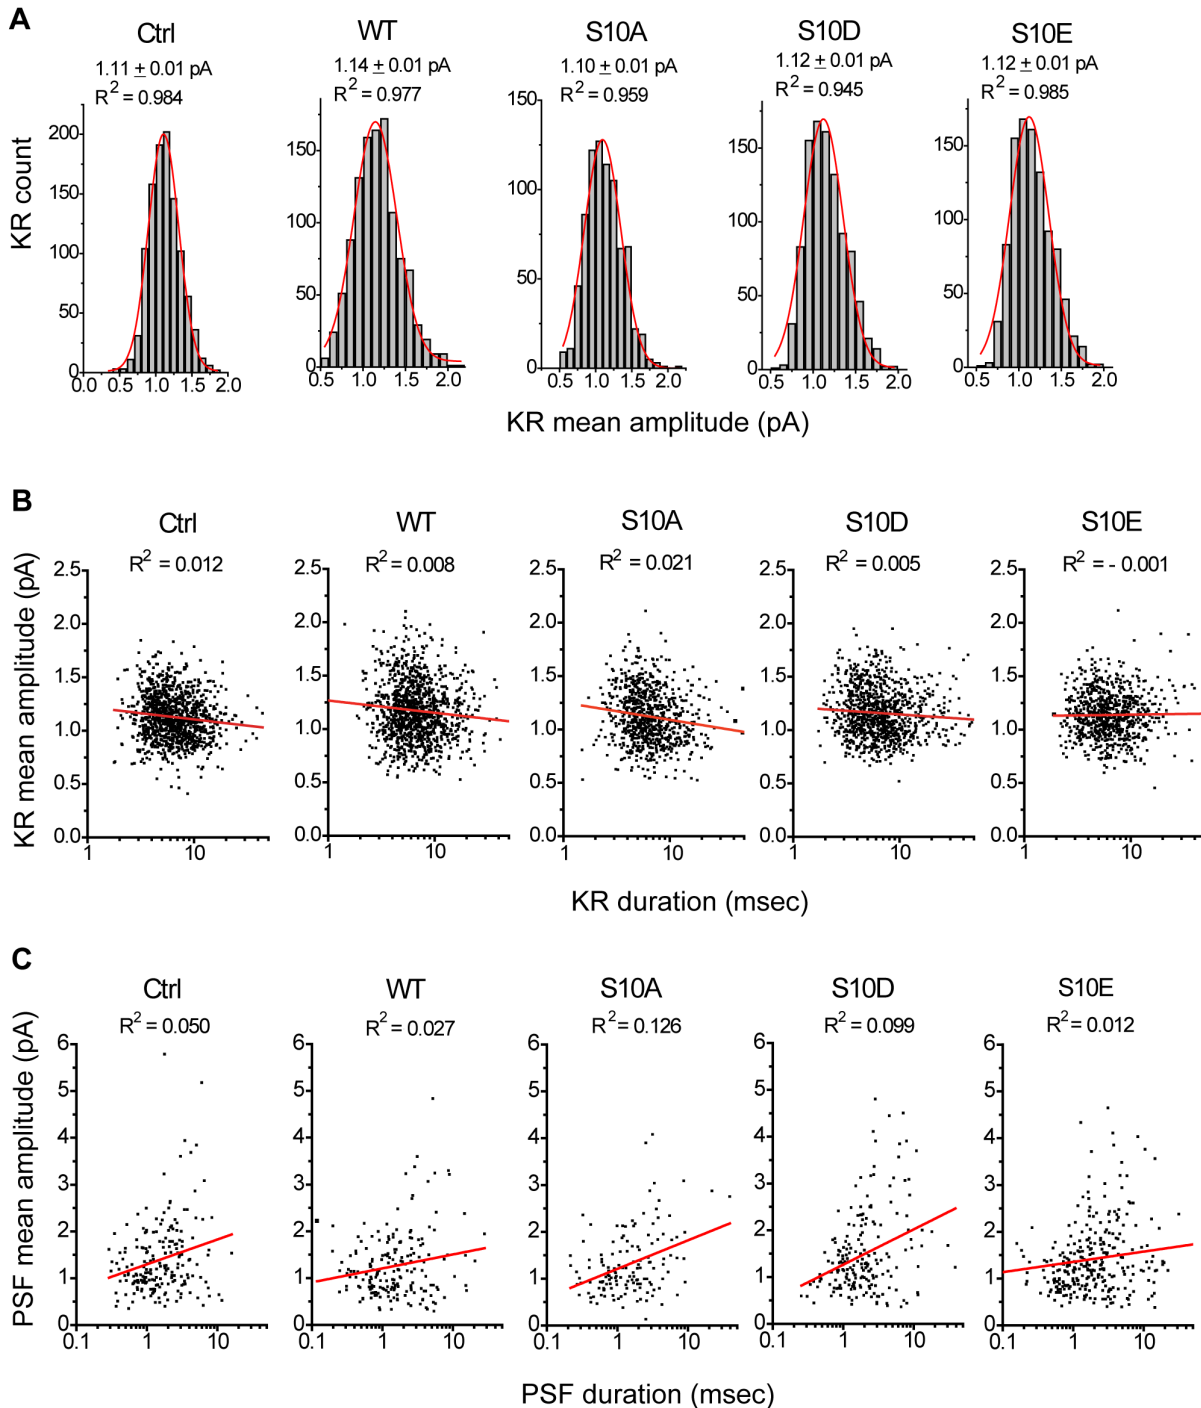

**Figure 4. KR events in cells overexpressing CSP and its phosphomutants.** **A**, Mean amplitude histograms of KR events fitted by Gaussian distributions (red) for all groups. The mean values and  $R^2$  from Gaussian distributions were as indicated. **B**, Scatter plots of mean amplitudes vs. durations for KR events. The  $R^2$  from linear regression (red) were as indicated. For **A** and **B**,  $n = 797\text{--}1112$  events. **C**, Scatter plots of PSF mean amplitudes vs. durations. The  $R^2$  from linear regression (red) were as indicated. Total 105–242 PSF events. doi:10.1371/journal.pone.0099180.g004



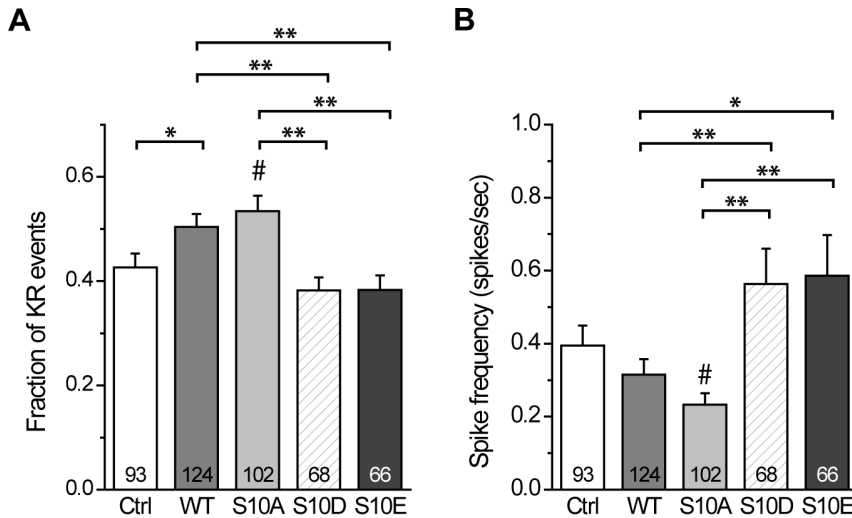

**Figure 5. Fraction of KR events and spike frequency in cells overexpressing CSP and its phosphomutants.** **A**, Fraction of KR events for the different groups. This fraction was calculated using the cellular mean method as the ratio of event numbers (i.e., number of 2–3.5 pA events divided by number of all events). Total 513–804 KR events from those cells. **B**, Spike frequencies for each group calculated using the cellular mean method from the start of KCl treatment to the end of recording (25 sec). Signals with peak amplitudes  $\geq 3.5$  pA were considered as spikes. Numbers in bars indicate the number of cells analyzed. Total 593–977 spikes from those cells. doi:10.1371/journal.pone.0099180.g005

S10E prolongs the opening of the initial fusion pore that leads to dilation compared to Ctrl or WT. With these results we can determine the fusion pore kinetics that are regulated by CSP $\alpha$  phosphomutation. The previously proposed kinetic model for fusion pores [3,6,8,36,37,38,39] defined that the transition states of fusion pores as closed state (C), open state (O), and dilation state (D). The rate constant of the step from C to O is defined as  $k_o$ , for the step from O to C as  $k_c$ , and for the step from O to D as  $k_d$ .

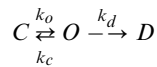

The rate constants  $k_c$  and  $k_d$  can be calculated using the following equations derived from single-channel kinetics [3,6,30,38,44,45,46,47]:

$$\tau = \frac{1}{k_c + k_d}$$

$$X_{KR} = \frac{k_c}{k_c + k_d}$$

We took the duration  $t_1$  as the measure for the open time of KR events ( $\tau$ ) (Figure S4-A). Both S10D and S10E had the longer KR open time compared to WT or S10A. In addition, the KR open time in S10E was significantly longer compared to Ctrl (Figure S4-A). Together with the fraction of KR events ( $X_{KR}$ ) (Fig. 5A),  $k_c$  and  $k_d$  can be addressed by these two equations.

Using these values from Fig. 5A and Figure S4-A, we calculated  $k_c$  and  $k_d$  for each group (Figure S4-B and C, respectively). With CSP $\alpha$  phosphomimetic mutation (i.e., S10D and S10E),  $k_c$  decreased (Figure S4-B), suggesting that this phosphomutation prevents fusion pores from leaving the open state and entering the closed state. Thus, CSP $\alpha$ -Ser<sup>10</sup> phosphomimetic mutation stabi-

lizes an open fusion pore (Figure S4-F). In contrast, both WT and S10A increased  $k_c$  (Figure S4-B) but decreased  $k_d$  (Figure S4-C), leading to the KR open time remained unchanged (Figure S4-A), but the fraction of KR events was significantly increased (Fig. 5A). Similar conclusion was obtained when the rate constants were resolved from the mean PSF lifetime (Figure S4-D for  $k_c$ ; Figure S4-E for  $k_d$ ). Given that the CSP $\alpha$  phosphomutants regulate the rate constants for the kinetic steps, CSP $\alpha$ -Ser<sup>10</sup> phosphomutation may play an important role in modulating fusion pore dynamics.

## Discussion

In this study, we show that CSP $\alpha$  phosphodeficient mutation decreases the secretion rate, increases the fraction of KR events, and decreases the frequency of full fusion compared to the control. In contrast, CSP $\alpha$  phosphomimetic mutation prolongs the lifetime of the PSF compared to the control. These physiological effects cannot be attributed to changes in the levels of Syt I and SNARE proteins, or to aberrant subcellular targeting of CSP. Our kinetic analysis suggests that CSP $\alpha$  phosphomimetic mutation promotes fusion pore openings mainly by inhibiting open pores from closing. Thus, the phosphomimetic mutation of CSP $\alpha$ -Ser<sup>10</sup> may regulate exocytosis by modulating fusion pore kinetics. The residue Ser<sup>10</sup> of CSP $\alpha$  may serve as a converged residue that allows diverse cellular signals to regulate the function of CSP $\alpha$  in regulated exocytosis.

Several mechanisms could underlie the regulation of fusion pore kinetics by CSP $\alpha$ -Ser<sup>10</sup> phosphomutation. Studies have shown that deleting the chaperone CSP $\alpha$  reduces the expression level of SN25 due to degradation of the misfolded SN25 [13,14]. However, here we exclude this possibility since CSP $\alpha$ -Ser<sup>10</sup> phosphomimetic mutation has no apparent effect on the expression levels of the essential exocytotic proteins, including Syt I and SNARE proteins (Figure S1-C). Our results suggest that the regulation of fusion pore kinetics by CSP $\alpha$  phosphomimetic mutation cannot be attributed to the altered chaperone function of CSP $\alpha$ , consistent with previous results showing that CSP $\alpha$ -Ser<sup>10</sup> phosphorylation does not affect formation of the CSP $\alpha$ -Hsc70 chaperone complex [16,26].



It is also unlikely that the regulation of fusion pore kinetics by CSP $\alpha$  phosphomimetic mutation is due to changes in intracellular Ca<sup>2+</sup> levels. Studies of the fusion pore kinetics [6] indicate that the rate constant of fusion pore closure ( $k_c$ ) does not significantly depend on the intracellular Ca<sup>2+</sup> levels. However, the rate constant for fusion pore dilation ( $k_d$ ) does increase with higher intracellular Ca<sup>2+</sup> levels following a sigmoidal Ca<sup>2+</sup> dependence, indicating that Ca<sup>2+</sup>'s action on fusion pore dilation is a cooperative process [6]. Here, we find that CSP $\alpha$  phosphomimetic mutation reduces  $k_c$  but just slightly affecting  $k_d$  (Figure S4-B, C, D, and E), suggesting that CSP $\alpha$  phosphomimetic mutation causes little change, if any, in intracellular Ca<sup>2+</sup> levels in PC12 cells. These results are consistent with previous findings that CSP $\alpha$  can directly regulate exocytosis without altering Ca<sup>2+</sup> entry, probably by influencing a step downstream of Ca<sup>2+</sup> binding to the exocytotic machinery [16,20,21,25,48].

One plausible mechanism for the regulation of fusion pore kinetics by CSP $\alpha$ -Ser<sup>10</sup> phosphomimetic mutation stems from this mutation enhancing the interaction between CSP $\alpha$  and Syx I (Text S1 and Figure S5). Syx I has residues in its transmembrane domain that face the lumen of the open fusion pore [49]. Mutations that selectively weaken the Syt I-Syx I binding do regulate  $k_c$  [5]. Thus, it is likely that CSP $\alpha$  phosphomimetic mutation inhibits  $k_c$  by increasing its binding to Syx I. How these changes in biochemical interactions lead to modulation of fusion pore dynamics requires further investigation. In addition, whether CSP $\alpha$ -Ser<sup>10</sup> phosphorylation alters its interaction with other SNARE proteins (i.e., SN25 and Syb) to regulate fusion pore kinetics requires further investigation.

Another plausible mechanism by which CSP $\alpha$  phosphomimetic mutation regulates fusion pore kinetics comes from the finding that CSP $\alpha$ -Syt binding alters after CSP $\alpha$ -Ser<sup>10</sup> phosphorylation [15,16]. Many studies have shown that fusion pore kinetics are regulated by various Syt isoforms [2,3,4,5,6,8,39,50]. For example, overexpression of Syt I or Syt IX stabilizes the initial fusion pore prior to dilation [3,8]. Notably, phosphorylation of CSP $\alpha$  reduces its interaction not only with Syt I [15], but also with Syt IX [16], the other major Syt isoform in PC12 cells [8,39,51]. Hence, CSP $\alpha$  phosphorylation may globally affect the role of this Ca<sup>2+</sup> sensor protein family in regulating fusion pore kinetics.

In addition to conventional SNARE proteins and Syt isoforms, CSP $\alpha$  has been shown to interact with dynamin I, a protein essential for vesicle fission, suggesting that CSP $\alpha$  may regulate synaptic vesicle endocytosis and facilitate exo- and endocytotic coupling [29]. Consistent with this finding, our results suggest that phosphorylation of CSP $\alpha$  may regulate fusion pore dynamics. How CSP $\alpha$  phosphorylation may affect its interaction with dynamin I requires for further investigation. Moreover, phosphorylation of CSP $\alpha$ -Ser<sup>10</sup> has been found to trigger the binding with 14-3-3 protein, a protein implicated in a range of roles including chaperone function, neurodegeneration, and exocytosis [52]. Thus, through changing the phosphorylated state by cellular signalings, CSP $\alpha$  may have a great capacity to interact with the downstream target proteins and modulate multiple neuronal functions.

Previous studies have produced conflicting results on the role of CSP $\alpha$  in Ca<sup>2+</sup>-dependent exocytosis, especially with experiments of CSP $\alpha$  overexpression [13,14,20,21,22,23,24,25,48]. These discrepancies may arise from different methods for data analysis of amperometric spikes. In chromaffin cells, these spikes can have the altered shapes [26] or areas [21,28] when wild-type or phosphodeficient CSP $\alpha$  is overexpressed. However, spike characteristics sometimes depend strongly on the cells producing the spikes [53,54]. Since the pooled data of spike characteristics may lead to over-representation of a few dominant cells within one

group, the double-mean method (i.e., the cellular mean method) should be used to reduce this bias. Furthermore, the discrepancies in CSP $\alpha$  overexpression experiments may also result from different cell types, culture conditions, or recording conditions, with different phosphorylation levels of endogenous CSP $\alpha$  [26,48]. These results strongly suggest that it is important to examine the effects of both phosphomimetic and phosphodeficient mutants and compare those effects with WT in the same type of cells. In our study, we found that the effects of WT were similar to those of S10A but were unlike those of S10D or S10E, consistent with that most CSP $\alpha$  proteins in WT-overexpressed PC12 cells are hypophosphorylated (Figure S5). Therefore, the phosphorylation levels of WT-CSP $\alpha$  may switch its function in regulating Ca<sup>2+</sup>-dependent exocytosis.

Some particular types of cells confer a high PKA or PKB activity, such as the developing neurons [55,56] and active endocrine cells [57,58]. Since CSP $\alpha$ -Ser<sup>10</sup> is phosphorylated by both PKA and PKB, CSP $\alpha$  phosphorylation is relatively important for promoting neurotransmitter and hormone release in these types of cells rather than PC12 cells in this study. Moreover, these protein kinases are activated by the second messengers that have shown to confer distinct spatiotemporal distributions in the cells [55,56]. Through dynamically changing its phosphorylated state *in situ*, CSP $\alpha$  may have a great capacity to regulate the rate of regulated exocytosis. Hence, CSP $\alpha$ -Ser<sup>10</sup> phosphorylation may provide a way for diverse cellular signalings to converge and regulate the kinetics of exocytosis. Given that loss of CSP $\alpha$  function associates with many neurological diseases [59,60], understanding the precise role of CSP $\alpha$  phosphorylation in regulated exocytosis is critical to unveil the mechanisms that underlie pathological conditions.

## Materials and Methods

### Molecular biology

The DNA encoding wild-type CSP $\alpha$ 1 (WT) was kindly provided by Dr. Cameron Gundersen (UCLA). It was subcloned into pIRES2EGFP (Clontech #6029-1) by polymerase chain reaction (PCR) with 30 cycles of 94°C for 1 min, 63°C for 1 min, and 72°C for 2 min. The primers annealing the upstream *Xho*I and downstream *Sa*I sites were 5'-CTC ATA GTT ACT AAC TCG AGA TGG CTG ACC-3' and 5'-CAC AGC CTC TCG TCG ACT TAG TTG AAC-3', respectively. The PCR product was digested by *Xho*I (Takara #1094A) and *Sa*I (Takara #1080A), and then inserted into pIRES2EGFP with ligation kit (Takara #6022). The resultant plasmid (pIRES2EGFP-CSP $\alpha$ 1) was transformed into Top10 competent cells (Invitrogen #C4040-10) and amplified in the Luria broth (LB) agar plates containing kanamycin (50  $\mu$ g/mL, Sigma #K4000). The DNA plasmid was purified (Qiagen #12181) and dissolved in Tris buffer (10 mM, pH 7.6).

The DNA plasmids encoding CSP $\alpha$ 1 phosphomutants (S10A, S10D and S10E) were prepared by modified sequential PCR [61] with pIRES2EGFP-CSP $\alpha$ 1 as the template. The phosphodeficient mutant (S10A) was prepared by replacing serine with alanine, and the phosphomimetic mutants (S10D and S10E) were prepared by replacing serine with negatively-charged amino acids, aspartate and glutamate, respectively. Two pairs of primers were used for modified sequential PCR. One pair of primers annealing the upstream *Bgl*II and downstream *Sac*II sites were 5'-GGG ACT TTC CTA CTT GGC AGT ACA TCT ACG-3' and 5'-CTT ATT CCA AGC GGC TTC GGC CAG TAA C-3', respectively. The other pair of primers (forward and reverse) were designed to introduce the point mutations at Ser<sup>10</sup> of CSP $\alpha$ 1. To introduce the S10A point mutation, the forward and reverse primers were 5'-

CAG CGC TCA CTC GCT ACT TCC GGG GAA TC-3' and 5'-GAT TCC CCG GAA GTA GCG AGT GAG CGC TG-3', respectively. (Note, here and below the underlined deoxynucleotides were complementary sequences to the specific site). To introduce the S10D point mutation, the forward and reverse primers were 5'-CAG CGC TCA CTC GAT ACT TCC GGG GAA TC-3' and 5'-GAT TCC CCG GAA GTA TCG AGT GAG CGC TG-3', respectively. To introduce the S10E point mutation, the forward and reverse primers were 5'-CAG CGC TCA CTC GAA ACT TCC GGG GAA TC-3' and 5'-GAT TCC CCG GAA GTT TCG AGT GAG CGC TG-3', respectively.

Three runs of PCR were included in modified sequential PCR. For the first run of PCR, one tube held the upstream primers, reverse primers containing mutation sites, template DNA, DNA polymerase (LA *Taq*, Takara #RR002A), and dNTPs, while the other tube held the downstream primers, forward primers containing mutation sites, template DNA, DNA polymerase, and dNTPs. The DNA fragments in both tubes were amplified by 30 cycles of 94°C for 1 min, 60°C for 2 min, and 72°C for 2 min. The first-run-PCR products were gel-extracted, purified (QiaGen #28704), and then combined for the second run of PCR using the same conditions except with only 10 cycles. The second-run-PCR product was added to the upstream primers, downstream primers, dNTPs, and DNA polymerase for the third run of PCR with 25 cycles of 94°C for 1 min, 52°C for 1 min, and 72°C for 2 min. The final PCR product was gel-extracted, purified, digested by *Bgl*II (Takara #1021A) and *Sac*II (Takara #1079A), and ligated into pIRES2EGFP.

The DNA plasmids encoding CSP $\alpha$ 1 phosphomutants (S10A, S10D and S10E) were confirmed by automated sequencing, amplified, and purified for transfection.

### Cell culture and transient transfection

PC12 cells [3,62] were cultured in 10 cm dishes (Corning #430167) in a medium containing Dulbecco's modified Eagle's medium (DMEM, Sigma #D5648), 3.7 g/ml NaHCO<sub>3</sub>, 5% Equine serum (HyClone #SH30074.03) and 5% bovine calf serum (HyClone #SH30072.03) at 37°C in a 10% CO<sub>2</sub> humidified incubator (MCO-5AC, Sanyo). The medium was renewed every other day, and the cells were passed into new dishes upon full confluence (~5 days).

For transient transfection, cells were washed and suspended with Hank's solution, consisting of Hanks' balanced salts (Sigma #H4891), 0.35 g/ml NaHCO<sub>3</sub>, and 1 mM EGTA, pH 7.2. The cells were then centrifuged at 2,000 *g* for 3 min. The supernatant was discarded, and the cell pellet was resuspended in 500  $\mu$ L of Cytomix (120 mM KCl, 0.15 mM CaCl<sub>2</sub>, 10 mM KH<sub>2</sub>PO<sub>4</sub>, 2.5 mM HEPES, 2 mM EGTA, and 5 mM MgCl<sub>2</sub>, pH 7.6). The cell suspension was further mixed with 50  $\mu$ g of DNA plasmid and transferred into a 4 mm cuvette (BTX ECM830, Harvard Apparatus #45-0126). Transfection was performed by electroporation with a pulse duration of 5 msec and a voltage of 230 V (BTX ECM830, square-pulse electroporator, Harvard Apparatus #04-001-1A). Transfected cells were immediately transferred into culture medium containing 10% fetal bovine serum (Biological Industries #04-004-1A). The medium was renewed on the following day. The cells expressing genes of interest were identified by green fluorescence at 2–5 days after transfection.

### Amperometry and data analysis

PC12 cells [3,62] were harvested at 48 hr post transfection using a 22 gauge needle (Terumo #SS-10L2238), re-plated onto 3.5 cm collagen I- and PDL-coated dishes at a density of  $2 \times 10^5$  per dish, and cultured for 4 hr. The cells were then incubated in

culture medium containing 1.5 mM norepinephrine (NE) (Sigma #N5785) and 0.5 mM ascorbate (Sigma #A5960) for 16 hr. Culture medium was replaced by fresh medium at least 1 hr prior to amperometric recordings. During recordings, cells were incubated in a bathing solution of 150 mM NaCl, 4.2 mM KCl, 1 mM NaH<sub>2</sub>PO<sub>4</sub>, 0.7 mM MgCl<sub>2</sub>, 2 mM CaCl<sub>2</sub> and 10 mM HEPES, pH 7.4 [3].

Amperometric recordings were conducted at 22°C using a 5  $\mu$ m carbon fiber (CFE-1, ALA Scientific Instruments) connected to a VA-10 $\times$  amplifier (ALA Scientific Instruments) at a polarization of 650 mV. The freshly-cut carbon fiber was gently attached to the cell, and Ca<sup>2+</sup>-dependent exocytosis was induced by puffing a high-K<sup>+</sup> solution (105 mM KCl instead of NaCl in the bathing solution) from a 2  $\mu$ m micropipette. For each trial of recordings, solutions were ejected for 20 sec with pressure (10–20 p.s.i.) gated by a Picospritzer (General Valve Corp.). Each cell was recorded for five consecutive trials. NE released from the cell was detected by the potentiated carbon fiber that was connected to the amplifier and a computer running pClamp 10 software (Axon Instruments, Molecular Devices Corp.). The signal was digitized at 4 kHz and low-pass-filtered by eight-pole Bessel at 1 kHz [3].

Amperometry data were analyzed using a computer program written in the previous studies [3,6,35] to extract PSF information according to the criteria of Chow and von Rűden [63]. Events with cut-off peak amplitudes above 2 pA ( $\sim 7 \times$  RMS noise) were collected. Large spikes (peak amplitude  $\geq 13$  pA) were used for analysis of PSF. The PSF lifetime was measured from onset (the current rising to  $1 \times$  RMS noise above the baseline current) to end point (the intersection between the baseline and the line going through the rise phase from 35 to 60% of the peak) [63] (Fig. 2A). The PSF area was integrated in this time interval (Fig. 2A, shaded area). The PSF mean amplitude was calculated from the area divided by the lifetime. The PSF with lifetimes under 0.75 msec ( $3 \times$  sampling interval) were excluded, yielding  $\sim 24\%$  spikes without PSF detected. The mean PSF duration ( $\tau$ ) (Fig. 2B) was determined by fitting the distribution of PSF lifetimes to an exponential function using the computer program Origin 8 (OriginLab Corp.).

Methods of analysis were developed previously [6] to distinguish the KR events from those full-fusion spikes that are distorted by diffusion [64]. Generally, once an event (with peak amplitude  $\geq 2$  pA) was identified by the computer program, the onset was taken as that used for PSF as mentioned above. The end of a putative KR event was taken as the time when the signal passed below the average value of the points between the two preliminary time boundaries defined by the 50% peak amplitude. The duration was referred to as  $t_1$  and illustrated in the traces in Fig. 3B–C. The duration  $t_2$  was measured from the onset to the end point, taken as the time when signal returned to within  $1 \times$  RMS noise of the baseline current (Fig. 3B–C). The ratios of these two times ( $t_1/t_2$ ) provided an index of event shape that was used to evaluate the rectangularity of KR events (Fig. 3C–D). The mean amplitude of KR events (Fig. 4A–B) was calculated from the integrated area divided by the duration  $t_1$  for comparison with PSF mean amplitude. We chose the duration  $t_1$  as the measure of KR open time because this duration is very sensitive to event shape and can distinguish the KR events from the events occurring at remote distance. During recording, if the carbon fiber electrode was not attached to the cell membrane very well, the events occurring at remote distance of the electrode would be detected and those events were distorted due to diffusion, resulting in small peak amplitude and long duration. In this scenario, the duration  $t_1$  usually became much longer ( $>$  several tens of msec), in contrast to the relatively brief duration  $t_1$  in the square-like events ( $\sim 7$  msec, Figure S4-A).

The features of spikes ( $\geq 3.5$  pA) were also analyzed by the written computer program (Fig. 2A). Spike height was the peak amplitude rising from the  $1 \times$ RMS noise above the baseline. Half-width was the time interval between the two points at the 50% peak amplitude. The rise time was taken as the time for the spike to rise from 35 to 90% of peak amplitude. The decay time was taken as the time to fall from the peak to within  $1 \times$ RMS noise of the baseline. The whole area was taken from the data integrated in the time interval between the onset (the signal rising to  $1 \times$ RMS noise above the baseline current) and end point (the signal returned to within  $1 \times$ RMS noise of the baseline current).

### Statistics

All data were reported as mean  $\pm$  S.E.M. (Origin 8, OriginLab Corp.). The double-mean method (i.e., the cellular mean method) was used to calculate the average of cellular means from individual cells to eliminate variations across cells [6,53]. Differences between the cellular means of two groups were evaluated for statistical significance using the two-tailed Student's unpaired *t*-test for the parametric method, and the Mann-Whitney method for the nonparametric method. Differences between the cellular means of larger groups ( $\geq 3$  groups) were evaluated with the One-way ANOVA followed by the *post-hoc* Student-Newman-Keuls test for the parametric method, and the Kruskal-Wallis method followed by the *post-hoc* Dunn test for the nonparametric method. Asterisks indicated significance in the following manner: \*,  $p < 0.05$ ; \*\*,  $p < 0.01$ ; \*\*\*,  $p < 0.001$  among two groups; #,  $p < 0.05$  in comparison with the control group (InStat 3, GraphPad).

### Supporting Information

**Figure S1 The expression levels of CSP and other essential exocytotic proteins after transfection.** **A**, Relative mRNA levels of CSP isoforms in the Ctrl cells (normalized to  $\beta$ -actin,  $n = 3$ ). Inset, CSP $\alpha$  splicing variants analyzed by RT-qPCR. CSP $\alpha 1$  corresponds to the 196 bp PCR product and CSP $\alpha 2$  to the 268 bp fragment. Left lane shows DNA length marker. **B**, Relative mRNA levels of CSP isoforms in cells transfected with WT-CSP $\alpha$  or its phosphomutants (normalized to  $\beta$ -actin and Ctrl,  $n = 3$ ). \* $p < 0.05$ , two-tailed Student's unpaired *t*-test. **C**, Protein levels of CSP, Syt I, Syx I, SN25, and Syb relative to  $\alpha$ -tubulin in cells transfected with control vector pIRES2EGFP (Ctrl), WT-CSP $\alpha$ , or its phosphomutants. **D**, Immunofluorescent images show the distribution of CSP (green) after KCl depolarization. EGFP (white) indicates cells with successful transfection in different groups. BF, bright field. Scale bars, 5  $\mu$ m. (PDF)

**Figure S2 The zoomed traces of amperometric recordings in cells overexpressing the CSP $\alpha$  phosphomimetic mutant (S10E).** Three continuous traces (**A–C**) were obtained from different cells. Insets in **A**, the zoomed windows to show the shape for the events with different peak amplitudes (a–c). Event “a” with peak amplitude of 2.23 pA; Event “b” with peak amplitude of 3.54 pA; Event “c” with peak amplitude of 11.89 pA. X-axis, current (pA); Y-axis, recording time (msec). (PDF)

**Figure S3 Histograms of spike mean amplitude in cells overexpressing CSP and its phosphomutants.** Histograms were constructed by spike “mean” amplitudes for all groups. Signals with peak amplitudes  $\geq 3.5$  pA were considered as spikes. Total 593–977 spikes from 66–124 cells. (PDF)

**Figure S4 Kinetics of the fusion pore modulated by CSP $\alpha$  phosphomutation.** **A**, The open time of KR events in cells overexpressing CSP and its phosphomutants. Total 513–804 KR events from 66–124 cells out of the same datasets in Fig. 5. **B**, The rate constant pushing the fusion pore toward closure ( $k_c$ ) that was derived from the KR open time (A) and the KR fraction (Fig. 5A). **C**, The rate constant pushing the fusion pore toward dilation ( $k_d$ ) that was derived from the KR open time (A) and the KR fraction (Fig. 5A). **D**, The rate constant pushing the fusion pore toward closure ( $k_c$ ) that was derived from the PSF duration (Fig. 2C) and the KR fraction (Fig. 5A). **E**, The rate constant pushing the fusion pore toward dilation ( $k_d$ ) that was derived from the PSF duration (Fig. 2C) and the KR fraction (Fig. 5A). **F**, Kinetic model of pore opening, closing, and dilation. CSP $\alpha$  phosphomimetic mutation inhibits an open fusion pore from closing (the kinetic step shown in red). (PDF)

**Figure S5 The binding with syntaxin I is increased in the CSP phosphomimetic mutants.** **A**, Phosphorylation levels in cells overexpressing CSP and its phosphomutants. PC12 cells transfected with WT, S10A, S10D, or S10E were treated with a high-K<sup>+</sup> solution for 15 min, and cell lysates were prepared. CSP protein was immunoprecipitated (IP), and phosphorylation was determined by immunoblotting (IB) with anti-phospho-PKA substrate antibody. **B**, Phosphorylation of CSP-Ser<sup>10</sup> modulates its interaction with syntaxin I (Syx I). Transfected PC12 cells were treated with a high-K<sup>+</sup> solution for 15 min, and cell lysates were prepared. CSP protein was immunoprecipitated, and Syx I was determined by immunoblotting with anti-Syx I antibody. **C**, Phosphorylation of overexpressed CSP-WT is comparable with endogenous CSP under the resting and high-K<sup>+</sup>-stimulated conditions. PC12 cells transfected with the control vector pIRES2EGFP (Vector) or CSP-WT were treated without or with a high-K<sup>+</sup> solution (KCl) for 15 min, and cell lysates were prepared. CSP protein was immunoprecipitated (IP), and phosphorylation was determined by immunoblotting (IB) with anti-phospho-PKA substrate antibody. Input control shows the levels of overexpression compared to the endogenous CSP. (PDF)

**Table S1 Characteristics of spikes in cells overexpressing CSP and its phosphomutants.** (PDF)

**Text S1 Methods: Reverse-transcriptase quantitative polymerase chain reaction (RT-qPCR), Western blot analysis, Immunofluorescence staining, and Immunoprecipitation.** (PDF)

### Acknowledgments

We thank Dr. Cameron Gundersen (UCLA, U.S.A.) for the rat CSP $\alpha 1$  plasmid, Dr. Meyer B. Jackson (U. of Wisconsin-Madison, U.S.A.) for support in developing this research direction, Dr. Payne Y. Chang for help with the data analysis software, the staff of TC5 Bio-Image Tools (Technology Commons, College of Life Science, NTU) for help with the confocal laser scanning microscope, and all labmates in the Wang lab for technical assistance.

### Author Contributions

Conceived and designed the experiments: CTW JCL. Performed the experiments: NC YTH HJY YCL JCL. Analyzed the data: NC YTH HJY JCL CTW. Wrote the paper: NC JCL CTW.

## References

- Jackson MB, Chapman ER (2008) The fusion pores of Ca<sup>2+</sup>-triggered exocytosis. *Nat Struct Mol Biol* 15: 684–689.
- Chapman ER (2008) How does synaptotagmin trigger neurotransmitter release? *Annu Rev Biochem* 77: 615–641.
- Wang CT, Grishanin R, Earles CA, Chang PY, Martin TF, et al. (2001) Synaptotagmin modulation of fusion pore kinetics in regulated exocytosis of dense-core vesicles. *Science* 294: 1111–1115.
- Wang P, Wang CT, Bai J, Jackson MB, Chapman ER (2003) Mutations in the effector binding loops in the C2A and C2B domains of synaptotagmin I disrupt exocytosis in a nonadditive manner. *J Biol Chem* 278: 47030–47037.
- Bai J, Wang CT, Richards DA, Jackson MB, Chapman ER (2004) Fusion pore dynamics are regulated by synaptotagmin\*<sup>1</sup>-SNARE interactions. *Neuron* 41: 929–942.
- Wang CT, Bai J, Chang PY, Chapman ER, Jackson MB (2006) Synaptotagmin-Ca<sup>2+</sup> triggers two sequential steps in regulated exocytosis in rat PC12 cells: fusion pore opening and fusion pore dilation. *J Physiol* 570: 295–307.
- Hui E, Johnson CP, Yao J, Dunning FM, Chapman ER (2009) Synaptotagmin-mediated bending of the target membrane is a critical step in Ca<sup>2+</sup>-regulated fusion. *Cell* 138: 709–721.
- Zhang Z, Hui E, Chapman ER, Jackson MB (2010) Regulation of exocytosis and fusion pores by synaptotagmin-effector interactions. *Mol Biol Cell* 21: 2821–2831.
- Pang ZP, Sudhof TC (2010) Cell biology of Ca<sup>2+</sup>-triggered exocytosis. *Curr Opin Cell Biol* 22: 496–505.
- Kochubev O, Lou X, Schneggenburger R (2011) Regulation of transmitter release by Ca<sup>2+</sup> and synaptotagmin: insights from a large CNS synapse. *Trends Neurosci* 34: 237–246.
- Chiang CW, Chen YC, Lu JC, Hsiao YT, Chang CW, et al. (2012) Synaptotagmin I regulates patterned spontaneous activity in the developing rat retina via calcium binding to the C2AB domains. *PLoS One* 7: e47465.
- Chamberlain LH, Burgoyne RD (2000) Cysteine-string protein: the chaperone at the synapse. *J Neurochem* 74: 1781–1789.
- Sharma M, Burre J, Bronk P, Zhang Y, Xu W, et al. (2012) CSP $\alpha$  knockout causes neurodegeneration by impairing SNAP-25 function. *EMBO J* 31: 829–841.
- Sharma M, Burre J, Sudhof TC (2011) CSP $\alpha$  promotes SNARE-complex assembly by chaperoning SNAP-25 during synaptic activity. *Nat Cell Biol* 13: 30–39.
- Evans GJ, Morgan A (2002) Phosphorylation-dependent interaction of the synaptic vesicle proteins cysteine string protein and synaptotagmin I. *Biochem J* 364: 343–347.
- Boal F, Laguerre M, Milochau A, Lang J, Scotti PA (2011) A charged prominence in the linker domain of the cysteine-string protein Csp $\alpha$  mediates its regulated interaction with the calcium sensor synaptotagmin 9 during exocytosis. *FASEB J* 25: 132–143.
- Zinsmaier KE, Hofbauer A, Heimbeck G, Pflugfelder GO, Buchner S, et al. (1990) A cysteine-string protein is expressed in retina and brain of *Drosophila*. *J Neurogenet* 7: 15–29.
- Mastrogiacomo A, Parsons SM, Zampighi GA, Jenden DJ, Umbach JA, et al. (1994) Cysteine string proteins: a potential link between synaptic vesicles and presynaptic Ca<sup>2+</sup> channels. *Science* 263: 981–982.
- Chamberlain LH, Henry J, Burgoyne RD (1996) Cysteine string proteins are associated with chromaffin granules. *J Biol Chem* 271: 19514–19517.
- Brown H, Larsson O, Branstrom R, Yang SN, Leibiger B, et al. (1998) Cysteine string protein (CSP) is an insulin secretory granule-associated protein regulating beta-cell exocytosis. *EMBO J* 17: 5048–5058.
- Graham ME, Burgoyne RD (2000) Comparison of cysteine string protein (Csp) and mutant alpha-SNAP overexpression reveals a role for csp in late steps of membrane fusion in dense-core granule exocytosis in adrenal chromaffin cells. *J Neurosci* 20: 1281–1289.
- Fernandez-Chacon R, Wolfel M, Nishimune H, Tabares L, Schmitz F, et al. (2004) The synaptic vesicle protein CSP  $\alpha$  prevents presynaptic degeneration. *Neuron* 42: 237–251.
- Umbach JA, Zinsmaier KE, Eberle KK, Buchner E, Benzer S, et al. (1994) Presynaptic dysfunction in *Drosophila* csp mutants. *Neuron* 13: 899–907.
- Zinsmaier KE, Eberle KK, Buchner E, Walter N, Benzer S (1994) Paralysis and early death in cysteine string protein mutants of *Drosophila*. *Science* 263: 977–980.
- Zhang H, Kelley WL, Chamberlain LH, Burgoyne RD, Wollheim CB, et al. (1998) Cysteine-string proteins regulate exocytosis of insulin independent from transmembrane ion fluxes. *FEBS Lett* 437: 267–272.
- Evans GJ, Wilkinson MC, Graham ME, Turner KM, Chamberlain LH, et al. (2001) Phosphorylation of cysteine string protein by protein kinase A. Implications for the modulation of exocytosis. *J Biol Chem* 276: 47877–47885.
- Evans GJ, Morgan A (2005) Phosphorylation of cysteine string protein in the brain: developmental, regional and synaptic specificity. *Eur J Neurosci* 21: 2671–2680.
- Evans GJ, Barclay JW, Prescott GR, Jo SR, Burgoyne RD, et al. (2006) Protein kinase B/Akt is a novel cysteine string protein kinase that regulates exocytosis release kinetics and quantal size. *J Biol Chem* 281: 1564–1572.
- Zhang YQ, Henderson MX, Colangelo CM, Ginsberg SD, Bruce C, et al. (2012) Identification of CSP $\alpha$  clients reveals a role in dynamin 1 regulation. *Neuron* 74: 136–150.
- Chow RH, von Ruden L, Neher E (1992) Delay in vesicle fusion revealed by electrochemical monitoring of single secretory events in adrenal chromaffin cells. *Nature* 356: 60–63.
- Alvarez de Toledo G, Fernandez-Chacon ZL, Fernandez JM (1993) Release of secretory products during transient vesicle fusion. *Nature* 363: 554–558.
- Albillos A, Dernick G, Horstmann H, Almers W, Alvarez de Toledo G, et al. (1997) The exocytotic event in chromaffin cells revealed by patch amperometry. *Nature* 389: 509–512.
- Ales E, Tabares L, Poyato JM, Valero V, Lindau M, et al. (1999) High calcium concentrations shift the mode of exocytosis to the kiss-and-run mechanism. *Nature Cell Biology* 1: 40–44.
- Dernick G, Alvarez de Toledo G, Lindau M (2003) Exocytosis of single chromaffin granules in cell-free inside-out membrane patches. *Nat Cell Biol* 5: 358–362.
- Wang CT, Lu JC, Bai J, Chang PY, Martin TF, et al. (2003) Different domains of synaptotagmin control the choice between kiss-and-run and full fusion. *Nature* 424: 943–947.
- Zhang Z, Jackson MB (2008) Temperature dependence of fusion kinetics and fusion pores in Ca<sup>2+</sup>-triggered exocytosis from PC12 cells. *J Gen Physiol* 131: 117–124.
- Zhang Z, Hui E, Chapman ER, Jackson MB (2009) Phosphatidyserine regulation of Ca<sup>2+</sup>-triggered exocytosis and fusion pores in PC12 cells. *Mol Biol Cell* 20: 5086–5095.
- Segovia M, Ales E, Montes MA, Bonifás I, Jemal I, et al. (2010) Push-and-pull regulation of the fusion pore by synaptotagmin-7. *Proc Natl Acad Sci U S A* 107: 19032–19037.
- Zhang Z, Wu Y, Wang Z, Dunning FM, Rehfuess J, et al. (2011) Release mode of large and small dense-core vesicles specified by different synaptotagmin isoforms in PC12 cells. *Mol Biol Cell* 22: 2324–2336.
- Wightman RM, Jankowski JA, Kennedy RT, Kawagoe KT, Schroeder TJ, et al. (1991) Temporally resolved catecholamine spikes correspond to single vesicle release from individual chromaffin cell. *Proc Natl Acad Sci USA* 88: 10754–10758.
- Bruns D, Jahn R (1995) Real-time measurement of transmitter release from single synaptic vesicles. *Nature* 377: 62–65.
- Zhou Z, Misler S, Chow RH (1996) Rapid fluctuations in transmitter release from single vesicle in bovine adrenal chromaffin cells. *Biophysical Journal* 70: 1543–1552.
- Fulop T, Smith C (2007) Matching native electrical stimulation by graded chemical stimulation in isolated mouse adrenal chromaffin cells. *J Neurosci Methods* 166: 195–202.
- Colquhoun D, Hawkes AG (1982) On the stochastic properties of bursts of single ion channel openings and of clusters of bursts. *Philos Trans R Soc Lond B Biol Sci* 300: 1–59.
- Jackson MB (1992) Ion channels: Single-channel analysis. *Meth Enzymol* 207: 729–746.
- Colquhoun D, Hawkes AG (1995) The principles of the stochastic interpretation of ion-channel mechanisms. In: Sakman B, Neher E, editors. *Single-Channel Recording*. 2nd ed. New York: Plenum Press. pp. 397–482.
- Han X, Jackson MB (2006) Structural transitions in the synaptic SNARE complex during Ca<sup>2+</sup>-triggered exocytosis. *J Cell Biol* 172: 281–293.
- Chamberlain LH, Burgoyne RD (1998) Cysteine string protein functions directly in regulated exocytosis. *Mol Biol Cell* 9: 2259–2267.
- Han X, Wang CT, Bai J, Chapman ER, Jackson MB (2004) Transmembrane segments of syntaxin line the fusion pore of Ca<sup>2+</sup>-triggered exocytosis. *Science* 304: 289–292.
- Lynch KL, Geron RR, Kielar DM, Martens S, McMahon HT, et al. (2008) Synaptotagmin-I utilizes membrane bending and SNARE binding to drive fusion pore expansion. *Mol Biol Cell* 19: 5093–5103.
- Zhu D, Zhou W, Liang T, Yang F, Zhang RY, et al. (2007) Synaptotagmin I and IX function redundantly in controlling fusion pore of large dense core vesicles. *Biochem Biophys Res Commun* 361: 922–927.
- Prescott GR, Jenkins RE, Walsh CM, Morgan A (2008) Phosphorylation of cysteine string protein on Serine 10 triggers 14-3-3 protein binding. *Biochem Biophys Res Commun* 377: 809–814.
- Colliver TL, Hess EJ, Pothos EN, Sulzer D, Ewing AG (2000) Quantitative and statistical analysis of the shape of amperometric spikes recorded from two populations of cells. *J Neurochem* 74: 1086–1097.
- Sorensen JB, Fernandez-Chacon R, Sudhof TC, Neher E (2003) Examining synaptotagmin I function in dense core vesicle exocytosis under direct control of Ca<sup>2+</sup>. *J Gen Physiol* 122: 265–276.
- Dunn TA, Wang CT, Colicos MA, Zaccolo M, DiPilato LM, et al. (2006) Imaging of cAMP levels and protein kinase A activity reveals that retinal waves drive oscillations in second-messenger cascades. *J Neurosci* 26: 12807–12815.
- Dunn TA, Feller MB (2008) Imaging second messenger dynamics in developing neural circuits. *Dev Neurobiol* 68: 835–844.

57. Zhang J, Hupfeld CJ, Taylor SS, Olefsky JM, Tsien RY (2005) Insulin disrupts beta-adrenergic signalling to protein kinase A in adipocytes. *Nature* 437: 569–573.
58. Kunkel MT, Ni Q, Tsien RY, Zhang J, Newton AC (2005) Spatio-temporal dynamics of protein kinase B/Akt signaling revealed by a genetically encoded fluorescent reporter. *J Biol Chem* 280: 5581–5587.
59. Chandra S, Gallardo G, Fernandez-Chacon R, Schluter OM, Sudhof TC (2005) Alpha-synuclein cooperates with CSPalpha in preventing neurodegeneration. *Cell* 123: 383–396.
60. Schmitz F, Tabares L, Khimich D, Strenzke N, de la Villa-Polo P, et al. (2006) CSPalpha-deficiency causes massive and rapid photoreceptor degeneration. *Proc Natl Acad Sci U S A* 103: 2926–2931.
61. Cormack B (1994) Introduction of a point mutation by sequential PCR steps. In: Ausubel FM, Brent R, Kingston RE, Moore DD, Seidman JG, et al., editors. *Current Protocols in Molecular Biology*. New York: John Wiley & Sons, Inc. pp. 8.5.7–8.5.9.
62. Hay JC, Martin TFJ (1992) Resolution of regulated secretion into sequential MgATP-dependent and Calcium-dependent stages mediated by distinct cytosolic proteins. *The Journal of Cell Biology* 119: 139–151.
63. Chow RH, von Ruden L (1995) Electrochemical detection of secretion from single cells. In: Sakman B, Neher E, editors. *Single-channel recording*. 2nd ed. New York: Plenum Press. pp. 245–275.
64. Haller M, Heinemann C, Chow RH, Heidelberger R, Neher E (1998) Comparison of secretory responses as measured by membrane capacitance and by amperometry. *Biophysical journal* 74.
