# Supplementary material for: Phosphomimetic Mutation of Cysteine String Protein-α Increases the Rate of Regulated Exocytosis by Modulating Fusion Pore Dynamics in PC12 Cells
Source: PubMed Central journal article supplement (PMC4067274; doi:10.1371/journal.pone.0099180), 2014-06-23
Supplement: pone.0099180.s005.pdf [file pone.0099180.s005.pdf]

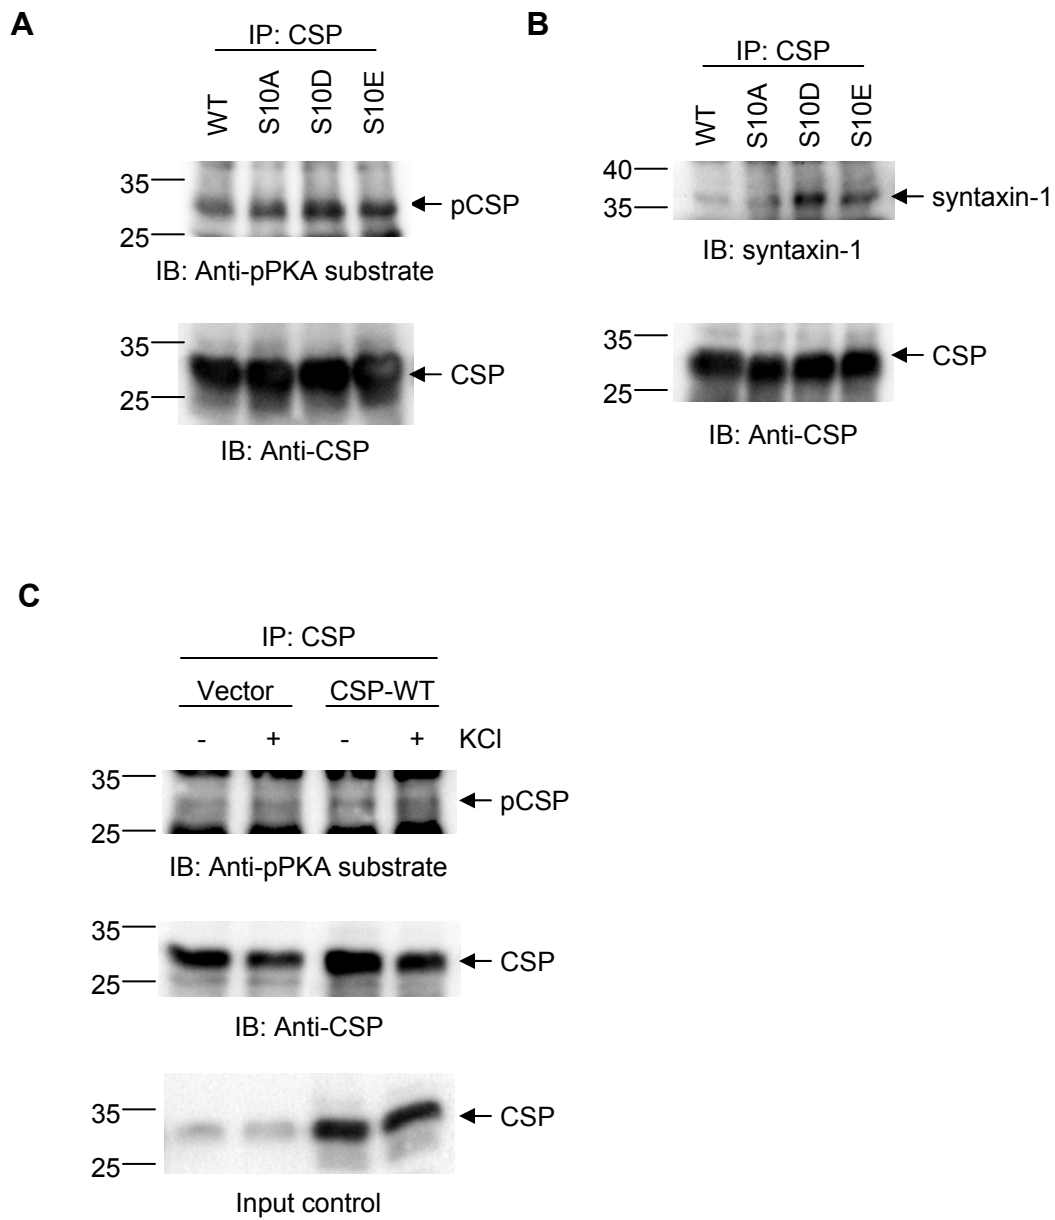

**Figure S5**
