# Supplementary material for: Phosphomimetic Mutation of Cysteine String Protein-α Increases the Rate of Regulated Exocytosis by Modulating Fusion Pore Dynamics in PC12 Cells
Source: PubMed Central journal article supplement (PMC4067274; doi:10.1371/journal.pone.0099180), 2014-06-23
Supplement: pone.0099180.s006.pdf [file pone.0099180.s006.pdf]

**Table S1. Characteristics of spikes in cells overexpressing CSP and its phosphomutants.**

|             | <i>Spike height<br/>(pA)</i> | <i>Half-width<br/>(msec)</i> | <i>35-90% Rise<br/>time (msec)</i> | <i>Decay time<br/>(msec)</i> | <i>Whole area<br/>(pA × msec)</i> | <i># cells</i> |
|-------------|------------------------------|------------------------------|------------------------------------|------------------------------|-----------------------------------|----------------|
| <b>Ctrl</b> | 8.19 ± 0.48                  | 5.65 ± 0.14                  | 1.31 ± 0.04                        | 19.57 ± 0.73                 | 51.26 ± 2.78                      | 87             |
| <b>WT</b>   | 7.71 ± 0.25                  | 5.93 ± 0.18                  | 1.42 ± 0.05                        | 19.61 ± 0.85                 | 55.75 ± 2.97                      | 107            |
| <b>S10A</b> | 7.23 ± 0.33                  | 5.82 ± 0.16                  | 1.33 ± 0.04                        | 19.51 ± 1.14                 | 48.21 ± 2.34                      | 86             |
| <b>S10D</b> | 7.47 ± 0.33                  | 5.58 ± 0.20                  | 1.26 ± 0.05                        | 19.92 ± 1.09                 | 50.11 ± 2.56                      | 65             |
| <b>S10E</b> | 7.58 ± 0.29                  | 5.46 ± 0.20                  | 1.22 ± 0.04                        | 18.60 ± 0.80                 | 48.54 ± 2.85                      | 65             |

The characteristics of spikes (with peak amplitude  $\geq 3.5$  pA) were automatically measured by a computer program according to the criteria shown in Figure 3A. The cellular mean methods were used to calculate the spike height, half-width, rise time (35-90% to peak), decay time, and whole area. No significant differences were found between Ctrl and WT. In addition, no significant differences were found among WT, S10A, S10D, and S10E. Total 593-977 spikes from 66-124 cells.
