# Supplementary material for: Phosphomimetic Mutation of Cysteine String Protein-α Increases the Rate of Regulated Exocytosis by Modulating Fusion Pore Dynamics in PC12 Cells
Source: PubMed Central journal article supplement (PMC4067274; doi:10.1371/journal.pone.0099180), 2014-06-23
Supplement: pone.0099180.s007.pdf [file pone.0099180.s007.pdf]

## Methods

### Reverse-transcriptase quantitative polymerase chain reaction (RT-qPCR)

PC12 cells [3,62] were harvested after 48 hr post transfection by centrifuging at 12,000 *g* at 4°C for 5 min. The supernatant was discarded, and the cell pellet was acutely frozen by liquid nitrogen. One microliter of TRIzol (Invitrogen #15596-018) was added to lyse the cell pellet while grinding it with a pestle. The lysate was incubated in TRIzol at room temperature for 5 min and then 200  $\mu$ L chloroform (Sigma #C2432) was added. The sample was vigorously shaken for 15 sec and then incubated at room temperature for 3 min. The lysate was centrifuged at 12,000 *g* at 4°C for 15 min, allowing its separation into three phases. The uppermost aqueous phase containing RNA was transferred into a new tube with 500  $\mu$ L isopropanol (Sigma #I9516). The sample was inverted 5 times, incubated at room temperature for 10 min, and then centrifuged at 12,000 *g* at 4°C for 10 min. The supernatant was discarded, and 1 mL of 75% ethanol was added. The sample was inverted once and centrifuged at 12,000 *g* at 4°C for 10 min. The supernatant was removed, and the RNA pellet was air-dried at room temperature. The pellet was dissolved in 20  $\mu$ L of RNase-free water and incubated in a 60°C water bath for 15 min. The final RNA sample was stored at -80°C.

The RNA samples were reverse-transcribed into first-strand cDNAs by Omniscript Reverse Transcriptase Kit (Qiagen # 205110, Germany). The cDNA products were dissolved by adding KAPA SYBR FAST qPCR Master Mix (Kapa Biosystems # KK4600), and were supplemented with upstream and downstream primers to perform qPCR under conditions of 95°C for the first 3 min followed by 40 cycles each of 95°C for 3 sec, 60°C for 45 sec, and 72°C for 30 sec. The upstream and downstream primers, respectively, were 5'-TGC TCT GGC TCC TAG CAC CAT GAA GAT CAA-3' and 5'-AAA CGC AGC TCA GTA ACA GTC CGC CTA GAA-3' for  $\beta$ -actin, 5'-GCC AAG GCG CTG TTC GCT GT-3' and 5'-TCG GTG TGT CTG TAG CCT CCC T-3' for CSP $\alpha$ , 5'-GCT GGT GGG CAA AGA CCC TGT-3' and 5-TGG TGT CGA TGT CTT GGG CCG-3' for CSP $\beta$ , and 5'-AGC CTA CAG GAA ACT GGC CTT GC-3' and 5'-GCG AGC CGT GCC GGT CAT AG-3' for CSP $\gamma$ . The upstream and downstream primers used to distinguish CSP $\alpha$ 1 and CSP $\alpha$ 2 mRNA were 5'-GCC AAG GCG CTG TTC GTC GT-3' and 5'-TCG GTG TGT CTG TAG CCT CCC T-3', respectively.

Fluorescence data from qPCR was collected during every cycle of extension, and analyzed by the qPCR machine (Qiagen Rotor-Gene Q) using supplemental software (Qiagen Rotor-Gene Series Software 1.7). The cycle of threshold (Ct), defined as the intersection on the threshold vs. amplification plot, was recorded for the internal control ( $\beta$ -actin) and the target genes (CSP $\alpha$ , CSP $\beta$ , and CSP $\gamma$ ). The value of Ct was analyzed using the method of  $\Delta\Delta$ Ct. Briefly, we first obtained  $\Delta$ Ct by subtracting the Ct of the internal control ( $\beta$ -actin) from the Ct of the target genes, and we then obtained  $\Delta\Delta$ Ct by subtracting the  $\Delta$ Ct of the Ctrl group (pIRES2EGFP) from the  $\Delta$ Ct of the other transfection groups. The relative expression levels of the target genes were calculated as  $2^{(-\Delta\Delta\text{Ct})}$  and were used to compare the transfection groups with the Ctrl group.

### **Western blot analysis**

PC12 cells were extracted using the ice-cold RIPA lysis buffer [1% NP-40, 150 mM NaCl, 1 mM EDTA, 1 mM phenylmethylsulfonyl fluoride, 1 mM sodium orthovanadate, 1 mM sodium fluoride, and 50 mM HEPES, pH 7.4, supplemented with protease inhibitor cocktail (Sigma #P2714)]. Twenty microliters of cellular protein lysate were electrophoresed via standard 12-15% Laemmli SDS polyacrylamide gels and transferred to polyvinylidene fluoride membranes. Membranes were blocked for 1 hr in 5% non-fat milk in TBST (100 mM Tris-HCl, pH 7.5, 150 mM NaCl, and 0.1% Tween-20), and were then incubated with primary antibodies [rabbit anti-CSP (Chemicon #AB1576), 1:5000; mouse anti-Syt I (Synaptic Systems #105011), 1:10000; mouse anti-Syx I (Santa Cruz #sc-12736), 1:8000; mouse anti-SN25 (Synaptic Systems #111011), 1:10000; mouse anti-Syb (Synaptic Systems #104211), 1:40000; mouse anti- $\alpha$ -tubulin (Sigma #T5168), 1:200000] at 4°C overnight. Membranes were washed three times with TBST and then incubated with secondary antibody in 5% milk in TBST at room temperature for 1 hr. Membranes then were washed three times with TBST, and signals were visualized by enhanced chemiluminescence followed by autoradiography.

### **Immunofluorescence staining**

For immunostaining, PC12 cells [3,62] at 60 hr post transfection were plated on coverslips previously coated with collagen I (5  $\mu\text{g}/\text{cm}^2$ ) (BD Biosciences #354246) and

poly-d-lysine (PDL) ( $5 \mu\text{g}/\text{cm}^2$ ) (BD Biosciences #354210). After attaching to the coverslips, the cells were first treated with a high- $\text{K}^+$  solution (105 mM KCl, 5 mM NaCl, 1 mM  $\text{NaH}_2\text{PO}_4$ , 0.7 mM  $\text{MgCl}_2$ , 2 mM  $\text{CaCl}_2$ , 10 mM HEPES, pH 7.4 with KOH) for 5 min, further washed with phosphate buffered saline (PBS: 137 mM NaCl, 2.7 mM KCl, 4.3 mM  $\text{Na}_2\text{HPO}_4$ , 1.47 mM  $\text{KH}_2\text{PO}_4$ , pH 7.4 with NaOH), and then fixed with 4% paraformaldehyde (Alfa Aesar #A11313) in PBS at room temperature for 10 min. After being washed twice with PBS, cells were permeabilized with 0.1% Triton X-100 (Sigma #T8532) in PBS for 10 min. They were then washed with PBS three times and blocked in 1% bovine serum albumin (BSA) (Sigma #SI-A9647) in PBS at room temperature for 1 hr. Cells were incubated in PBS containing 2% BSA and primary antibodies (1:1000, rabbit anti-CSP; Chemicon #AB1576) at  $4^\circ\text{C}$  overnight or at room temperature for 2 hr. After being washed with PBS four times, they were incubated in PBS containing 2% BSA and secondary antibodies conjugated with fluorescent labels (1:1000, Donkey anti-rabbit Alexa Fluor-647; Invitrogen #A31573) at room temperature in the dark for 1 hr. Cells were then washed with PBS five times and coverslips were mounted on slides with Fluoromount G (Electron Microscopy Sciences, #17984-25). Excess liquid was removed, and coverslips were sealed using transparent nail polish. Slides were stored at  $4^\circ\text{C}$  until fluorescent images were acquired by confocal fluorescence microscopy (Leica TCS SP5 Confocal Spectral Microscope Imaging System) under a  $100\times$  oil-immersion objective (numerical aperture = 1.40; HCXPL APO CS) with the section thickness about  $0.77 \mu\text{m}$ . Quantification of colocalization was determined with MetaMorph software (Version 7.5, Molecular Devices).

### **Immunoprecipitation**

PC-12 cells [3,62] transfected with WT and mutant CSP constructs were treated with a high- $\text{K}^+$  solution for 15 min and then lysed in the ice-cold RIPA buffer. The soluble fractions were pre-cleared, then immunoprecipitated with anti-CSP antibodies (Chemicon #AB1576) overnight. The complex was incubated with protein G agarose beads for 2h. The immunoprecipitates were washed, boiled with Laemmli sample buffer, and then used for Western blot analysis with primary antibodies [Syx I (Santa Cruz #sc-12736); phospho-PKA substrate (Cell Signaling #9624); CSP (Chemicon #AB1576)].
